# Supplementary material for: Effectiveness of non-pharmacological strategies in the management of type 2 diabetes in primary care: a protocol for a systematic review and network meta-analysis
Source: PubMed Central journal article supplement — BMJ Open. 2020 Jan 12;10(1):e034481. doi: 10.1136/bmjopen-2019-034481 (PMC7045081; doi:10.1136/bmjopen-2019-034481), 2020-01-12
Supplement: bmjopen-2019-034481.draft_revisions.pdf [file bmjopen-2019-034481.draft_revisions.pdf]

# BMJ Open

BMJ Open is committed to open peer review. As part of this commitment we make the peer review history of every article we publish publicly available.

When an article is published we post the peer reviewers' comments and the authors' responses online. We also post the versions of the paper that were used during peer review. These are the versions that the peer review comments apply to.

The versions of the paper that follow are the versions that were submitted during the peer review process. They are not the versions of record or the final published versions. They should not be cited or distributed as the published version of this manuscript.

BMJ Open is an open access journal and the full, final, typeset and author-corrected version of record of the manuscript is available on our site with no access controls, subscription charges or pay-per-view fees (<http://bmjopen.bmj.com>).

If you have any questions on BMJ Open's open peer review process please email [editorial.bmjopen@bmj.com](mailto:editorial.bmjopen@bmj.com)

# BMJ Open

## Effectiveness of non-pharmacological strategies in management of type 2 diabetes in primary care: a protocol for a systematic review and network meta-analysis

|                               |                                                                                                                                                                                                                                                                                                                                                                                                                                                                                                                                                                                                                                                                                                                                                                                                                                                                                                                                                                                                                                                  |
|-------------------------------|--------------------------------------------------------------------------------------------------------------------------------------------------------------------------------------------------------------------------------------------------------------------------------------------------------------------------------------------------------------------------------------------------------------------------------------------------------------------------------------------------------------------------------------------------------------------------------------------------------------------------------------------------------------------------------------------------------------------------------------------------------------------------------------------------------------------------------------------------------------------------------------------------------------------------------------------------------------------------------------------------------------------------------------------------|
| Journal:                      | <i>BMJ Open</i>                                                                                                                                                                                                                                                                                                                                                                                                                                                                                                                                                                                                                                                                                                                                                                                                                                                                                                                                                                                                                                  |
| Manuscript ID                 | bmjopen-2019-034481                                                                                                                                                                                                                                                                                                                                                                                                                                                                                                                                                                                                                                                                                                                                                                                                                                                                                                                                                                                                                              |
| Article Type:                 | Protocol                                                                                                                                                                                                                                                                                                                                                                                                                                                                                                                                                                                                                                                                                                                                                                                                                                                                                                                                                                                                                                         |
| Date Submitted by the Author: | 21-Sep-2019                                                                                                                                                                                                                                                                                                                                                                                                                                                                                                                                                                                                                                                                                                                                                                                                                                                                                                                                                                                                                                      |
| Complete List of Authors:     | <p>Leite, Renata; Sao Paulo State University Julio de Mesquita Filho Botucatu Campus Faculty of Medicine, Department of Internal Medicine Banzato , Luísa ; Sao Paulo State University Julio de Mesquita Filho Botucatu Campus Faculty of Medicine, Department of Internal Medicine Galendi, Julia; Sao Paulo State University Julio de Mesquita Filho Botucatu Campus Institute of Biosciences, Department of Internal Medicine</p> <p>Bolfi, Fernanda; Sao Paulo State University Julio de Mesquita Filho Botucatu Campus Faculty of Medicine, Department of Internal Medicine Mendes, Adriana; Sao Paulo State University Julio de Mesquita Filho Botucatu Campus Faculty of Medicine, Department of Internal Medicine Veroniki, Areti-Angeliki; University of Ioannina, Hygiene and Epidemiology</p> <p>Thabane, Lehana ; McMaster University, Clinical Epidemiology &amp; Biostatistics</p> <p>Nunes-Nogueira, Vania; Sao Paulo State University Julio de Mesquita Filho Botucatu Campus Faculty of Medicine, ; Botucatu Medical School</p> |
| Keywords:                     | diabetes mellitus type 2, primary health care, systematic review, network meta-analysis.                                                                                                                                                                                                                                                                                                                                                                                                                                                                                                                                                                                                                                                                                                                                                                                                                                                                                                                                                         |
|                               |                                                                                                                                                                                                                                                                                                                                                                                                                                                                                                                                                                                                                                                                                                                                                                                                                                                                                                                                                                                                                                                  |

SCHOLARONE™  
Manuscripts

1  
2  
3 **Effectiveness of non-pharmacological strategies in management of type 2 diabetes**  
4 **in primary care: a protocol for a systematic review and network meta-analysis**  
5  
6

7 Renata Giacomini Oliveira Ferreira Leite <sup>(1)</sup>, Luísa Rocco Banzato <sup>(1)</sup>, Júlia Simões Corrêa  
8 Galendi <sup>(1)</sup>, Adriana Lúcia Mendes <sup>(1)</sup>, Fernanda Bolfi<sup>(1)</sup>, Areti Angeliki Veroniki<sup>(2,3,4,5)</sup>,  
9 Lehana Thabane <sup>(6,7)</sup>, Vania dos Santos Nunes–Nogueira <sup>(1)</sup>  
10  
11

- 12  
13 1. Department of Internal Medicine – São Paulo State University/UNESP, Medical School,  
14 Sao Paulo, Brazil.  
15  
16 2. Department of Primary Education, School of Education, University of Ioannina,  
17 Ioannina, Greece.  
18  
19 3. Knowledge Translation Program, Li Ka Shing Knowledge Institute, St. Michael's  
20 Hospital, Toronto, Ontario, Canada.  
21  
22 4. Institute of Reproductive and Developmental Biology, Department of Surgery & Cancer,  
23 Faculty of Medicine, Imperial College, London, United Kingdom  
24  
25 5. Li Ka Shing Knowledge Institute, St. Michael's Hospital, Unity Health Toronto, Toronto,  
26 ON, Canada  
27  
28 6. Department of Health Research Methods, Evidence, and Impact, McMaster University,  
29 Hamilton, ON, Canada  
30  
31 7. Departments of Pediatrics and Anesthesia, McMaster University, Hamilton, ON, Canada

32 E-mail address  
33

34  
35 Leite RGOF: [renataocchiuto@ig.com.br](mailto:renataocchiuto@ig.com.br)

36 Banzato LR: [lubanzato@gmail.com](mailto:lubanzato@gmail.com)

37 Galendi JSC: [jsimoescorrea@gmail.com](mailto:jsimoescorrea@gmail.com)

38 Mendes AL: [mendes.adrianalucia@gmail.com](mailto:mendes.adrianalucia@gmail.com)

39 Bolfi F: [febolfi@gmail.com](mailto:febolfi@gmail.com)

40 Veroniki AA: [averonik@cc.uoi.gr](mailto:averonik@cc.uoi.gr)

41 Thabane L: [ThabanL@mcmaster.ca](mailto:ThabanL@mcmaster.ca)  
42

43  
44  
45  
46 Corresponding Author:

47 Vania dos Santos Nunes Nogueira

48 Departamento de Clínica Médica – FMB – UNESP

49 Avenida Professor Mário Rubens Guimarães Montenegro s/n, Bairro UNESP, Campus Botucatu,  
50 Botucatu-SP 18618-687, Brazil

51 Phone: (55 14) 3880 11 71

52 Fax: (55 14) 3880 16 67

53 E-mail: [vania.nunes-nogueira@unesp.br](mailto:vania.nunes-nogueira@unesp.br)

54 Word count: 3037  
55  
56  
57  
58  
59  
60

## ABSTRACT

**Introduction:** Despite the increasing number of drugs and various guidelines on the management of type 2 diabetes (T2DM), many patients continue with the disease uncontrolled. There are several non-pharmacological treatments available for managing T2DM, but many them have never been compared directly to determine the best strategies. **Objective:** This study will evaluate the comparative effectiveness of non-pharmacological strategies in the management of T2DM in primary care or community settings. **Methods and Analysis:** We will perform a systematic review and network meta-analysis (NMA), and will include randomized controlled trials if one of the following interventions were applied in adult patients with T2DM: nutritional therapy, physical activity, psychological interventions, social interventions, multidisciplinary lifestyle interventions, diabetes self-management education and support (DSMES), technology-enabled DSMES, interventions delivered only either by pharmacists or by nurses, self-blood glucose monitoring in non-insulin-treated T2DM, health coaching, benchmarking, and conventional management of T2DM. The primary outcome will be glycemic control (glycated hemoglobin (HbA1c) (%)), and the secondary outcomes will be weight loss, quality of life, patient satisfaction, frequency of cardiovascular events and deaths, number of patients in each group with HbA1c <7, adverse events, medication adherence. Four general and adaptive search strategies have been created for Embase, Medline, Latin American and Caribbean Health Sciences Literature (LILACS) and Cochrane Central Register of Controlled Trials (CENTRAL). Four reviewers will assess studies for their eligibility and their risk of bias in pairs and independently, as well as will extract data from included studies. We will conduct an NMA using a Bayesian hierarchical model, and will obtain the treatment hierarchy using the surface under the cumulative ranking (SUCRA) curve. To determine our confidence in an overall treatment ranking from the

1  
2  
3 NMA we will follow the GRADE (Grading of Recommendations Assessment,  
4  
5 Development and Evaluation) approach.  
6  
7

8  
9 **Ethics Dissemination:** As no primary data collection will be undertaken, no formal  
10  
11 ethical assessment is required. We plan to present the results of this systematic review in  
12  
13 a peer-reviewed scientific journal, conferences and the popular press.  
14

15  
16 **Registration Number:** Our systematic review protocol has been registered with the  
17  
18 International Prospective Register of Systematic Reviews (PROSPERO) on  
19  
20 \_\_\_\_\_2019 (registration number \_\_\_\_\_).  
21

22  
23 **Key words:** diabetes mellitus type 2, primary health care, systematic review, network  
24  
25 meta-analysis.  
26  
27

#### 28 29 **Strengths and limitations of this study:** 30

- 31  
32 • This is the first NMA in the field, and our results can help health managers to  
33  
34 implement non-pharmacological strategies in diabetes management in primary  
35  
36 care.  
37
- 38  
39 • We will apply the GRADE approach to evaluate our confidence in an overall  
40  
41 treatment ranking from the NMA.  
42
- 43  
44 • Bias due to deviations from intended interventions and due to missing outcome  
45  
46 data may be the main limitations of the study.  
47
- 48  
49 • As the primary outcome selected is a surrogate endpoint, the quality of evidence  
50  
51 according to GRADE approach will be probably low.  
52  
53  
54  
55  
56  
57  
58  
59  
60

## INTRODUCTION

Diabetes mellitus (DM) is an important challenge in public health, not only due to their high morbidity and mortality but also to the direct and indirect expenses associated with their treatment.<sup>1</sup> In addition, the number of individuals with this dysglycaemia is continuously increasing along with the high prevalence of obesity.

In 2015, the International Diabetes Federation (IDF) estimated that 8.8% (uncertainty interval: 7.2 to 11.4) of the world population aged between 20 and 79 (including 415 million people) lived with diabetes and 5.0 million deaths were attributable to diabetes.<sup>2</sup> For 2040, the IDF has estimated that 642 million adult people (uncertainty interval: 521 to 829 million) will have diabetes (global estimate prevalence of 10.4%).<sup>2</sup>

Type 2 diabetes (T2DM) accounts for 90 to 95% of all cases of diabetes, and usually affects individuals from the fourth decade of life, although in some countries there is an increase in its incidence in children and young people.<sup>3</sup>

The most relevant risk factor for complications related to T2DM is inadequate glycaemic control.<sup>4</sup> Prospective studies have evidenced an association between degree of hyperglycemia and increased risk of micro and macrovascular complications in patients with T2DM.<sup>5</sup>

The United Kingdom Prospective Diabetes Study (UKPDS) demonstrated that in patients with T2DM an intensive blood glucose control, a median HbA1C level of 7.0% in comparison with a median level of 7.9%, was associated with a significant reduction in the incidence of microvascular complications.<sup>6</sup> In addition, each 1% reduction in updated mean HbA1c was associated with reductions in risk of 14% for myocardial

1  
2  
3 infarction (95% confidence interval (CI) 8% to 21%) and 21% for deaths related to  
4  
5 diabetes (95% CI 15% to 27%).<sup>5</sup>  
6  
7

8  
9 Despite the increasing number of drugs available and various guidelines on the  
10 management of T2DM, an expressive number of patients continue with the disease  
11 uncontrolled. In a multicenter, cross-sectional, epidemiological, questionnaire-based  
12 study conducted in nine Latin American countries, 56.8% of patients T2DM had poor  
13 glycaemic control (HbA1c  $\geq 7\%$ ).<sup>7</sup> The highest prevalence of unsuccessful treatment was  
14 in Peru, where only 7.5% achieved metabolic and blood pressure levels as recommended  
15 by the American Diabetes Association (ADA).<sup>8</sup> In the United States, according to a survey  
16 performed between 1998 and 2002, only 42.3% of adults had HbA1c levels less than 7%,  
17 and 14% had HbA1c 10% or more.<sup>9</sup>  
18  
19  
20  
21  
22  
23  
24  
25  
26  
27  
28  
29

30 It is believed that this discrepancy between the large number of tools to treat these  
31 patients and the low frequency of diabetes control is due to knowledge gaps, attitudes and  
32 practices related to diabetes by patients and physicians who treat these individuals.<sup>10</sup>  
33  
34  
35  
36  
37

38 Therefore, in order to increase the percentage of diabetic patients with the disease  
39 controlled and thereby reduce the number of deaths and morbidities related to this disease,  
40 it has been studied the effectiveness of new strategies to help patients to control their  
41 disease. These measures are complementary to the pharmacological treatment, and its  
42 main objective is for patients to recognize the importance of self-management and full  
43 involvement to treat their condition.<sup>10 11</sup>  
44  
45  
46  
47  
48  
49  
50  
51

52 The Innovative Care for Chronic Conditions framework advocated by the IDF has  
53 divided these interventions in the treatment of diabetes into three spheres: macro (policy  
54 and funding), meso (health and community organization) and micro (patient and  
55 family).<sup>11</sup>  
56  
57  
58  
59  
60

1  
2  
3 In the micro sphere, studies in T2DM have shown that programs focused on  
4 counseling, therapy compliance, explanation of possible adverse events, patient  
5 empowerment are associated with better glycemic and quality-of-life controls, and,  
6 consequently, lower follow-up costs.<sup>10-13</sup>  
7  
8  
9  
10  
11  
12

13 Although several systematic reviews have evaluated the effectiveness of these  
14 strategies in the management of T2DM,<sup>8,14</sup> no NMAs were found that compared multiple  
15 interventions simultaneously in a single model.  
16  
17  
18  
19  
20

21 The objective of this review is to evaluate the comparative effectiveness of non-  
22 pharmacological strategies in the management of T2DM in primary care or community  
23 settings. We aim to asses all types of non-pharmacological interventions targeting a  
24 greater commitment from patients in the control of T2DM.  
25  
26  
27  
28  
29  
30

## 31 **METHODS AND DESIGN**

  
32  
33

34 This systematic review and network NMA protocol has been registered with the  
35 International Prospective Register of Systematic Reviews (PROSPERO) database  
36 (registration number:), and it was developed following the Preferred Reporting Items for  
37 Systematic Reviews and Meta-Analyses for protocols (PRISMA-P).<sup>15</sup>  
38  
39  
40  
41  
42  
43

### 44 **Patient and Public Involvement**

  
45  
46

47 We will not directly include patient-level data in this study, but the protocol  
48 development, priority of the research question, choice of outcome measures, and type of  
49 intervention were informed by discussions with members of the Brazilian Health Ministry  
50 which identified this research as being a priority area for managing patients with T2DM  
51 in primary health care.  
52  
53  
54  
55  
56  
57  
58  
59  
60



## Eligibility Criteria

We will include randomized controlled trials (RCTs) if one or more interventions (described below) were applied in adult patients, over 18 years of age, with a diagnosis of T2DM according to ADA <sup>12</sup>. Comparator will be considered a conventional management of T2DM (drug treatment associated with a general orientation regarding lifestyle changes provided by a general practitioner) or another intervention.

## Definitions of interventions

We will consider as intervention all non-pharmacological and patient-mediated strategies <sup>16</sup> that are complementary to the drug treatment of T2DM, and whose main objective was to promote in diabetic patients a greater commitment to this condition and consequently a better control of their disease.

Based on our previous search in the literature, the interventions may be (1) nutritional therapy (dietary quality or energy restriction), <sup>17</sup> (2) physical activity program (running, walking, bicycling, swimming, resistance training, yoga, Tai chi, many others), <sup>17</sup> (3) psychological interventions (emotion-focused or cognition-focused), <sup>18</sup> (4) social network interventions (friends, families and peers), <sup>19</sup> (5) multidisciplinary lifestyle interventions (an intervention that combines at least two of the following modalities: physical activity, nutrition therapy, social or psychological support), <sup>20</sup> (6) diabetes self-management education and support (DSMES), <sup>21</sup> (7) technology-enabled DSMES (mobile phones, secure messaging, web-based information), <sup>22</sup> (8) interventions delivered only or mainly by pharmacists (DSMES and/or pharmacy management), <sup>23</sup> (9) interventions delivered only or mainly by nurses (DSMES and/or pharmacy management), <sup>24</sup> (10) self-blood glucose monitoring in non-insulin-treated T2DM, <sup>25</sup> (11) health coaching, <sup>26</sup>, (12) benchmarking. <sup>27</sup>

1  
2  
3 The intervention must have been performed at primary care (or in community  
4 settings), with minimum period of three months.  
5  
6  
7

8 An evaluation with a nutritionist, nurse, physical trainer, psychologist or educator  
9 in diabetes, which provides a general orientation regarding lifestyle changes will be  
10 considered conventional treatment if the patients are not provided with subsequent  
11 follow-up.  
12  
13  
14  
15  
16  
17

### 18 **Type of outcomes**

19  
20  
21 The primary outcome will be glycemic control (HbA1c (%)). The secondary  
22 outcomes will be weight loss (measured by weight or waist circumference, or body mass  
23 index (BMI)), quality of life, patient satisfaction, frequency of cardiovascular events and  
24 deaths, number of patients in each group with HbA1c <7, adverse events related to non-  
25 pharmacological strategies, medication adherence.  
26  
27  
28  
29  
30  
31  
32  
33

### 34 **Time of outcome evaluation**

35  
36  
37 The outcomes will be evaluated at 6, 12, and more than 12 months. For trials with  
38 outcomes within these time-points we will consider the closest time-point, and for those  
39 who had more than one time of outcome evaluation, we will consider the longest time-  
40 point.  
41  
42  
43  
44  
45  
46

### 47 **Exclusion Criteria**

48  
49  
50 We will exclude trials conducted in other scenarios than primary care or  
51 community sittings, trials whose aim was to compare the effectiveness of  
52 pharmacological treatments, trials in which the intervention was any type of surgery to  
53 lose weight, trials with follow-up inferior to six months and trials that included  
54 predominantly participants with secondary diabetes, type 1 DM, or gestational diabetes.  
55  
56  
57  
58  
59  
60

### **Data sources and search strategy**

Four search strategies will be created and will be adapted to electronic health databases: Embase (by Elsevier, 1980-2019), Medline (by PubMed, 1966-2019), LILACS (by Virtual Health Library, 1982-2019) and Controlled Clinical Trials of the Cochrane Collaboration (CENTRAL - Cochrane). The terms and synonyms of T2DM and primary health care will be used. There will be no language or year restriction. We will use the validated RCT filters created by the Cochrane Collaboration for Medline and Embase. A draft Medline search strategy is included in Appendix 1.

The following databases will also be searched for eligible studies: Trip database, SCOPUS, Web of Science, CINAHL, Australasian Medical Index, Chinese Biomedical Literature Database. We will also search for studies on ClinicalTrials.gov, and the gray literature, through conferences, abstracts published and dissertations.

References of relevant primary or secondary studies will be searched in order to identify additional eligible studies. We will use the Endnote software to download all references and remove duplicates. The initial screening of abstracts and titles will be performed using the software Rayyan QCRI.

### **Study selection**

Four reviewers independently will perform in pairs the assessment of titles and abstracts (RGOFL, LRB, JSCG, VSNN), and the studies potentially eligible for the inclusion in the review will be selected for full reading and subsequently assessed for adequacy to the eligibility criteria. In case of disagreement, there will be a consensus meeting before the final decision.

### **Data extraction**

1  
2  
3 For each selected trial, two reviewers will use an extraction form to record the  
4 year of publication, number of patients included, duration of follow-up, information  
5 regarding the inclusion and exclusion criteria, type of intervention (frequency,  
6 descriptions, durations), baseline data (average age, gender, weight, BMI and WC,  
7 glycemic control prior to the study, duration of T2DM, medications in use), and all  
8 reported outcome measures (in all time points). To ensure consistency between reviewers,  
9 we will perform a calibration exercise before beginning the review. In the case of  
10 duplicate publications or more reports from the primary trial, data extraction will be  
11 optimized using the best information available for all the items in the same trial.  
12  
13  
14  
15  
16  
17  
18  
19  
20  
21  
22

### 23 24 **Assessment of bias risk in included studies**

25  
26  
27 For each selected trial, the risk of bias will be assessed according to the criteria  
28 described in the revised Cochrane risk-of-bias tool for randomized trials (RoB 2 tool),<sup>28</sup>  
29 which considers for each outcome evaluated five domains: (1) bias arising from the  
30 randomization process, (2) bias due to deviations from intended interventions, (3) bias  
31 due to missing outcome data, (4) bias in measurement of the outcome, (5) bias in selection  
32 of the reported result. Each of the items will be evaluated by two reviewers as having low  
33 risk of bias, some concerns, and high risk of bias. In case of disagreement, there will be  
34 a discussion between the reviewers before the final classification.  
35  
36  
37  
38  
39  
40  
41  
42  
43  
44  
45  
46

### 47 **Data synthesis**

### 48 49 **Dealing with missing data**

50  
51  
52  
53 The authors of the original studies will be contacted, if necessary, to provide  
54 missing information for each study included. We will use the data available in published  
55 articles provided by their authors or registration platforms. If available, we will  
56 preferentially use the data from intention-to-treat analysis. If numerical outcome data are  
57  
58  
59  
60

1  
2  
3 missing and they cannot be obtained from the authors, we will calculate them, when  
4 possible, from other available statistics, such as p values.<sup>29</sup> If an outcome value is  
5 reported without a measure of variance, standard deviations (SDs) will be imputed  
6 according to the method suggested by Furukawa et al.<sup>30</sup>  
7  
8  
9  
10  
11  
12

### 13 **Assessment of transitivity across treatment comparisons**

14  
15  
16 The transitivity across treatment comparisons will be assessed using boxplots, and  
17 we are proposing seven a priori hypotheses to explain variability between studies as  
18 possible effect modifiers: (1) patient characteristics (average patient age, gender  
19 distribution, disease severity, time of diabetes diagnosis, presence of diabetes chronic  
20 complications), (2) type of pharmacological treatment of T2DM, (3) study methodology  
21 quality (low risk of bias compared with high risk of bias ), sample size (large versus small  
22 studies), (4) duration of follow-up (6-12 months, more than 12 months), (5) frequency  
23 of sessions/visits with participants, (6) medication adherence, (7) adherence to a healthier  
24 lifestyle. Conventional management of T2DM will be assessed for their similarity across  
25 treatment comparisons.<sup>31</sup>  
26  
27  
28  
29  
30  
31  
32  
33  
34  
35  
36  
37  
38  
39

### 40 **Methods for direct and indirect or mixed treatment comparisons**

41  
42  
43 We will perform an NMA for each outcome to compare multiple interventions  
44 simultaneously in a single model.  
45  
46  
47

48  
49 We will preferentially pool the direct evidence, however, in the absence of direct  
50 comparisons, the effect estimate will be provided by indirect comparisons.  
51  
52  
53

54  
55 Considering the expected between-study heterogeneity, we will use a random-  
56 effects (RE) model for each intervention comparison.  
57  
58  
59  
60

1  
2  
3 We will pool the data of each outcome using a Bayesian RE model separately.  
4  
5 For dichotomous data, effect estimates will be calculated using odds ratio (OR) with a  
6  
7 95% credible interval (CrIs). The continuous data will be expressed as means and SDs  
8  
9 for each study, and the mean difference or standardized mean difference (if different  
10  
11 metrics are used across studies) will be calculated with their respective 95% CrIs. For  
12  
13 count outcomes, we will calculate the rate ratio with a 95% CrI. For multi-arm studies,  
14  
15 we plan to use data from all reported comparisons using the approach suggested by  
16  
17 Rucker et al by reducing the relevant weighting scheme.<sup>32</sup>  
18  
19  
20  
21

22 The intervention effect estimates will be presented along with their corresponding  
23  
24 95% CrIs, and we will obtain the treatment hierarchy using the surface under the  
25  
26 cumulative ranking (SUCRA) curve, with its 95% CrI, and the rank-heat plot.<sup>33 34</sup>It is  
27  
28 expected that the best treatment will have high SUCRA values while the worst will have  
29  
30 low values. For each comparison, we will present the direct, indirect, and network  
31  
32 estimates.  
33  
34  
35

### 36 **Assessment of statistical heterogeneity**

37  
38  
39

40 For direct evidence, we will assess heterogeneity by estimating the magnitude of  
41  
42 the between-study variance using the empirical distribution as estimated by Turner et al.  
43  
44 <sup>35</sup> and Rhodes et al. <sup>36</sup>, and by using the  $I^2$  statistic to quantify the percentage of variability  
45  
46 that is due to true differences between studies rather than sampling error. <sup>37 38</sup>. We will  
47  
48 interpret the  $I^2$  according to thresholds set forth by the Cochrane Collaboration <sup>29</sup>, and it  
49  
50 will be used as a criterion for pooling or not the results and for performing additional  
51  
52 subgroup analyses. For count outcomes, we will use a minimally informative prior  
53  
54 distribution ( $\sim$  Uniform(0,2)).<sup>39</sup>  
55  
56  
57  
58  
59  
60

1  
2  
3 If enough studies are available, we will perform subgroup analysis using the same  
4 potential treatment effect modifiers described above. Our a priori hypothesis will be  
5 individuals with longer time of T2DM, taking insulin, with a poorly controlled diabetes  
6 at baseline (an uninterrupted HbA1c >8.0% for  $\geq 1$  year despite standard care) and with  
7 more chronic diabetes complications subgroups may show less improvement in the  
8 primary and secondary outcomes. We will also perform a network meta-regression  
9 whenever possible (i.e., when at least 10 studies are available) using the random-effects  
10 model to evaluate the impact of these potential effect modifiers (patient characteristic,  
11 study quality, intervention type, follow up time, adherence).  
12  
13  
14  
15  
16  
17  
18  
19  
20  
21  
22  
23  
24

25 In the combination of direct and indirect estimates, violation of the transitivity  
26 assumption (described above) will also lead to inconsistency. We will assess loop  
27 inconsistency (disagreement between direct and indirect estimates) using the loop-  
28 specific method, and design inconsistency (disagreement between studies that inform the  
29 same treatment comparison but include a different number of treatment arms) using the  
30 design-by-treatment model based on a  $\chi^2$  test.<sup>40-43</sup>  
31  
32  
33  
34  
35  
36  
37

### 38 **Sensitivity analysis**

39  
40  
41 If sufficient studies are available, we will conduct a sensitivity analysis to assess  
42 the robustness of results.<sup>35 36</sup> We will assess the effect of excluding studies with high  
43 risk of selection and attrition bias, and studies with imputed data.  
44  
45  
46  
47  
48

### 49 **Assessment of publication biases**

50  
51  
52 For each treatment comparison, if more than 10 studies are included in the meta-  
53 analysis, we will use the funnel plot to investigate the presence of publication bias.<sup>29</sup> In  
54 such cases, we will also perform the Begg's rank correlation<sup>44</sup> and Egger's regression  
55 tests<sup>45</sup>.  
56  
57  
58  
59  
60

## Quality of evidence

To determine our confidence in an overall treatment ranking from the NMA we will follow the GRADE (Grading of Recommendations Assessment, Development and Evaluation) approach, with some modifications as described below in order to reflect specific issues from NMA.<sup>46</sup> This process will be performed in pairs and independently (RGOFL, LRB, JSCG, VSNN).

Based on the five categories (risk of bias, imprecision, inconsistency and publication bias) the certainty of evidence of effect estimates obtained by direct comparisons will be rated as high, moderate, low, or very low.

For indirect comparisons, the quality of evidence in estimates will be rated following the GRADE categories used for assessing the direct comparisons in addition to the transitivity assessment. We will focus our assessments on quality of indirect evidence on the dominant first-order loop (loops with a single common comparator connecting the two interventions of the comparison of interest). The quality of evidence rating for indirect comparisons will be the lower of the ratings of quality for the two direct estimates that contribute to the first order loop of the indirect comparison. For instance, if one of the direct comparisons will be rated as low and the other will be rated as moderate evidence, we will rate the quality of indirect evidence as low [45]. We will rate down the quality of the indirect comparison one further level for violation of the transitivity assumption (similarity of trials in terms of population, intervention (type and dosing frequency), settings, and trial methodology) [45].

We will rate the confidence in each NMA effect estimate using the higher rating when both direct and indirect evidences are present. However, we may rate down confidence in the network estimate if we find that the direct and indirect estimates have



1  
2  
3 inconsistency (measured by the difference of point estimates and the extent of overlap of  
4  
5 CrIs and of direct and indirect effect estimates).  
6  
7  
8  
9

## 10 **DISCUSSION**

11  
12  
13  
14 The continuously increasing prevalence of T2DM together the unsatisfactory  
15  
16 glycemic control by some individuals justify the search for new and effective strategies  
17  
18 for the prevention and control of this metabolic disease.  
19

20  
21 Since inadequate glycemic control in DM is most often related to poor adherence  
22  
23 to lifestyle changes and to the proposed treatment, initiatives have emerged to promote a  
24  
25 better acceptance / understanding of the disease and its treatment by the patients. With  
26  
27 this is expected that individuals have a more active participation in the control of his  
28  
29 disease, and thus to achieve higher rates of glycemic control and fewer complications  
30  
31 associated with this dysglycemia.  
32  
33  
34  
35

36 Since there are several different strategies for this purpose, we aim to answer the  
37  
38 following question: what is the effectiveness of non-pharmacological strategies in the  
39  
40 primary health care in promote in patients with T2DM a greater commitment of this  
41  
42 condition and consequently a better control of their disease? The answer to this  
43  
44 question may assist health managers in implementing these actions in primary care  
45  
46 settings.  
47  
48  
49

50  
51 To the best of our knowledge to date, there is no systematic review and NMA  
52  
53 considering the direct and indirect effect of non-pharmacological interventions targeting  
54  
55 a greater commitment from patients in the control of T2DM.  
56  
57  
58  
59  
60

## ETHICS DISSEMINATION

As no primary data collection will be undertaken, no formal ethical assessment is required by our institution. We plan to present the findings of this systematic review in a peer-reviewed scientific journal. We also intend to present it, including preliminary findings, at the appropriate conferences.

### Authors' contributions:

VSNN, LT and AAV conceptualized and design the study. LT, RGOFL, AAV and VSNN draft the manuscript protocol. VSNN, RGOFL, LRB, ALM, JSCG, AAV and LT critically revised the protocol and manuscript submitted. All authors read and approved the final manuscript.

### Funding statement:

This research has been partially supported by the São Paulo Research Foundation (FAPESP): Grant number: 2018/25035-5, and AAV is funded by the European Union's Horizon 2020 [No. 754936]

### Competing interests' statement:

There are no competing interests.

## REFERENCES

1. Diabetes SBd. Diretrizes da Sociedade Brasileira de Diabetes In: Farmacêutica SPA, ed., 2017-2018.
2. Ogurtsova K, da Rocha Fernandes JD, Huang Y, et al. IDF Diabetes Atlas: Global estimates for the prevalence of diabetes for 2015 and 2040. *Diabetes research and clinical practice* 2017;128:40-50. doi: 10.1016/j.diabres.2017.03.024 [published Online First: 2017/04/25]
3. American Diabetes A. 2. Classification and Diagnosis of Diabetes: Standards of Medical Care in Diabetes-2019. *Diabetes care* 2019;42(Suppl 1):S13-S28. doi: 10.2337/dc19-S002 [published Online First: 2018/12/19]

- 1
- 2
- 3
4. Skyler JS, Bakris GL, Bonifacio E, et al. Differentiation of Diabetes by Pathophysiology, Natural History, and Prognosis. *Diabetes* 2017;66(2):241-55. doi: 10.2337/db16-0806 [published Online First: 2016/12/17]
5. Stratton IM, Adler AI, Neil HA, et al. Association of glycaemia with macrovascular and microvascular complications of type 2 diabetes (UKPDS 35): prospective observational study. *BMJ (Clinical research ed)* 2000;321(7258):405-12. doi: 10.1136/bmj.321.7258.405 [published Online First: 2000/08/11]
6. Intensive blood-glucose control with sulphonylureas or insulin compared with conventional treatment and risk of complications in patients with type 2 diabetes (UKPDS 33). UK Prospective Diabetes Study (UKPDS) Group. *Lancet* 1998;352(9131):837-53. [published Online First: 1998/09/22]
7. Lopez Stewart G, Tambascia M, Rosas Guzman J, et al. Control of type 2 diabetes mellitus among general practitioners in private practice in nine countries of Latin America. *Rev Panam Salud Publica* 2007;22(1):12-20. doi: 10.1590/s1020-49892007000600002 [published Online First: 2007/10/13]
8. Huayanay-Espinoza IE, Guerra-Castanon F, Lazo-Porrás M, et al. Metabolic control in patients with type 2 diabetes mellitus in a public hospital in Peru: a cross-sectional study in a low-middle income country. *PeerJ* 2016;4:e2577. doi: 10.7717/peerj.2577 [published Online First: 2016/10/21]
9. Saaddine JB, Cadwell B, Gregg EW, et al. Improvements in diabetes processes of care and intermediate outcomes: United States, 1988-2002. *Ann Intern Med* 2006;144(7):465-74. [published Online First: 2006/04/06]
10. Jacob S, Serrano-Gil M. Engaging and empowering patients to manage their type 2 diabetes, Part II: Initiatives for success. *Advances in therapy* 2010;27(10):665-80. doi: 10.1007/s12325-010-0071-0 [published Online First: 2010/09/17]
11. Serrano-Gil M, Jacob S. Engaging and empowering patients to manage their type 2 diabetes, Part I: a knowledge, attitude, and practice gap? *Advances in therapy* 2010;27(6):321-33. doi: 10.1007/s12325-010-0034-5 [published Online First: 2010/06/17]
12. American Diabetes A. Standards of Medical Care in Diabetes-2017 Abridged for Primary Care Providers. *Clin Diabetes* 2017;35(1):5-26. doi: 10.2337/cd16-0067 [published Online First: 2017/02/02]
13. Chapman A, Liu S, Merkouris S, et al. Psychological Interventions for the Management of Glycemic and Psychological Outcomes of Type 2 Diabetes Mellitus in China: A Systematic Review and Meta-Analyses of Randomized Controlled Trials. *Frontiers in public health* 2015;3:252. doi: 10.3389/fpubh.2015.00252 [published Online First: 2015/12/05]
14. Loveman E, Frampton GK, Clegg AJ. The clinical effectiveness of diabetes education models for Type 2 diabetes: a systematic review. *Health technology assessment (Winchester, England)* 2008;12(9):1-116, iii. [published Online First: 2008/04/15]
15. Shamseer L, Moher D, Clarke M, et al. Preferred reporting items for systematic review and meta-analysis protocols (PRISMA-P) 2015: elaboration and explanation. *BMJ (Clinical research ed)* 2015;350:g7647. doi: 10.1136/bmj.g7647 [published Online First: 2015/01/04]
16. Effective Practice and Organisation of Care (EPOC). EPOC Taxonomy 2015 [Available from: <https://epoc.cochrane.org/epoc-taxonomy> accessed 04 July 2019.
17. Davies MJ, D'Alessio DA, Fradkin J, et al. Management of Hyperglycemia in Type 2 Diabetes, 2018. A Consensus Report by the American Diabetes Association (ADA) and the European Association for the Study of Diabetes (EASD). *Diabetes care* 2018;41(12):2669-701. doi: 10.2337/dci18-0033 [published Online First: 2018/10/07]
18. Chew BH, Vos RC, Metzendorf MI, et al. Psychological interventions for diabetes-related distress in adults with type 2 diabetes mellitus. *The Cochrane database of systematic*

- 1  
2  
3                    *reviews* 2017;9:CD011469. doi: 10.1002/14651858.CD011469.pub2 [published Online  
4                    First: 2017/09/28]
- 5 19. Spencer-Bonilla G, Ponce OJ, Rodriguez-Gutierrez R, et al. A systematic review and meta-  
6                    analysis of trials of social network interventions in type 2 diabetes. *BMJ Open*  
7                    2017;7(8):e016506. doi: 10.1136/bmjopen-2017-016506 [published Online First:  
8                    2017/08/23]
- 9 20. Johansen MY, MacDonald CS, Hansen KB, et al. Effect of an Intensive Lifestyle Intervention  
10                    on Glycemic Control in Patients With Type 2 Diabetes: A Randomized Clinical Trial.  
11                    *JAMA* 2017;318(7):637-46. doi: 10.1001/jama.2017.10169 [published Online First:  
12                    2017/08/16]
- 13 21. Chatterjee S, Davies MJ, Heller S, et al. Diabetes structured self-management education  
14                    programmes: a narrative review and current innovations. *Lancet Diabetes Endocrinol*  
15                    2018;6(2):130-42. doi: 10.1016/S2213-8587(17)30239-5 [published Online First:  
16                    2017/10/04]
- 17 22. Greenwood DA, Gee PM, Fatkin KJ, et al. A Systematic Review of Reviews Evaluating  
18                    Technology-Enabled Diabetes Self-Management Education and Support. *J Diabetes Sci*  
19                    *Technol* 2017;11(5):1015-27. doi: 10.1177/1932296817713506 [published Online First:  
20                    2017/06/01]
- 21 23. Aubert RE, Herman WH, Waters J, et al. Nurse case management to improve glycemic  
22                    control in diabetic patients in a health maintenance organization. A randomized,  
23                    controlled trial. *Ann Intern Med* 1998;129(8):605-12. doi: 10.7326/0003-4819-129-8-  
24                    199810150-00004 [published Online First: 1998/10/24]
- 25 24. Azami G, Soh KL, Sazlina SG, et al. Effect of a Nurse-Led Diabetes Self-Management  
26                    Education Program on Glycosylated Hemoglobin among Adults with Type 2 Diabetes. *J*  
27                    *Diabetes Res* 2018;2018:4930157. doi: 10.1155/2018/4930157 [published Online First:  
28                    2018/09/19]
- 29 25. Zhu H, Zhu Y, Leung SW. Is self-monitoring of blood glucose effective in improving  
30                    glycaemic control in type 2 diabetes without insulin treatment: a meta-analysis of  
31                    randomised controlled trials. *BMJ Open* 2016;6(9):e010524. doi: 10.1136/bmjopen-  
32                    2015-010524 [published Online First: 2016/09/04]
- 33 26. Willard-Grace R, Chen EH, Hessler D, et al. Health coaching by medical assistants to  
34                    improve control of diabetes, hypertension, and hyperlipidemia in low-income patients:  
35                    a randomized controlled trial. *Ann Fam Med* 2015;13(2):130-8. doi: 10.1370/afm.1768  
36                    [published Online First: 2015/03/11]
- 37 27. Hermans MP, Elisaf M, Michel G, et al. Benchmarking is associated with improved quality of  
38                    care in type 2 diabetes: the OPTIMISE randomized, controlled trial. *Diabetes care*  
39                    2013;36(11):3388-95. doi: 10.2337/dc12-1853 [published Online First: 2013/07/13]
- 40 28. Higgins JPT SJ, Savović J, Page MJ, Hróbjartsson A, Boutron I, Reeves B, Eldridge S., editor. *A*  
41                    *revised tool for assessing risk of bias in randomized trials In: Chandler J, McKenzie J,*  
42                    *Boutron I, Welch V (editors). Cochrane Methods. Cochrane Database of Systematic*  
43                    *Reviews* 2016.
- 44 29. Collaboration TC. Cochrane Handbook for Systematic Reviews of Interventions Version  
45                    5.1.0 [updated March 2011], 2011.
- 46 30. Furukawa TA, Barbui C, Cipriani A, et al. Imputing missing standard deviations in meta-  
47                    analyses can provide accurate results. *J Clin Epidemiol* 2006;59(1):7-10. doi:  
48                    10.1016/j.jclinepi.2005.06.006 [published Online First: 2005/12/20]
- 49 31. Salanti G, Marinho V, Higgins JP. A case study of multiple-treatments meta-analysis  
50                    demonstrates that covariates should be considered. *J Clin Epidemiol* 2009;62(8):857-  
51                    64. doi: 10.1016/j.jclinepi.2008.10.001 [published Online First: 2009/01/23]
- 52 32. Rucker G, Schwarzer G. Reduce dimension or reduce weights? Comparing two approaches  
53                    to multi-arm studies in network meta-analysis. *Stat Med* 2014;33(25):4353-69. doi:  
54                    10.1002/sim.6236 [published Online First: 2014/06/20]
- 55  
56  
57  
58  
59  
60

- 1  
2  
3 33. Salanti G, Ades AE, Ioannidis JP. Graphical methods and numerical summaries for  
4 presenting results from multiple-treatment meta-analysis: an overview and tutorial. *J*  
5 *Clin Epidemiol* 2011;64(2):163-71. doi: 10.1016/j.jclinepi.2010.03.016 [published  
6 Online First: 2010/08/07]  
7  
8 34. Veroniki AA, Straus SE, Fyraridis A, et al. The rank-heat plot is a novel way to present the  
9 results from a network meta-analysis including multiple outcomes. *J Clin Epidemiol*  
10 2016;76:193-9. doi: 10.1016/j.jclinepi.2016.02.016 [published Online First:  
11 2016/03/05]  
12  
13 35. Turner RM, Davey J, Clarke MJ, et al. Predicting the extent of heterogeneity in meta-  
14 analysis, using empirical data from the Cochrane Database of Systematic Reviews. *Int J*  
15 *Epidemiol* 2012;41(3):818-27. doi: 10.1093/ije/dys041 [published Online First:  
16 2012/03/31]  
17  
18 36. Rhodes KM, Turner RM, Higgins JP. Predictive distributions were developed for the extent  
19 of heterogeneity in meta-analyses of continuous outcome data. *J Clin Epidemiol*  
20 2015;68(1):52-60. doi: 10.1016/j.jclinepi.2014.08.012 [published Online First:  
21 2014/10/12]  
22  
23 37. Higgins JP, Thompson SG. Quantifying heterogeneity in a meta-analysis. *Stat Med*  
24 2002;21(11):1539-58. doi: 10.1002/sim.1186 [published Online First: 2002/07/12]  
25  
26 38. Higgins JP, Thompson SG, Deeks JJ, et al. Measuring inconsistency in meta-analyses. *BMJ*  
27 (*Clinical research ed*) 2003;327(7414):557-60. doi: 10.1136/bmj.327.7414.557  
28 [published Online First: 2003/09/06]  
29  
30 39. Lambert PC, Sutton AJ, Burton PR, et al. How vague is vague? A simulation study of the  
31 impact of the use of vague prior distributions in MCMC using WinBUGS. *Stat Med*  
32 2005;24(15):2401-28. doi: 10.1002/sim.2112 [published Online First: 2005/07/15]  
33  
34 40. White IR, Barrett JK, Jackson D, et al. Consistency and inconsistency in network meta-  
35 analysis: model estimation using multivariate meta-regression. *Res Synth Methods*  
36 2012;3(2):111-25. doi: 10.1002/jrsm.1045 [published Online First: 2012/06/01]  
37  
38 41. Higgins JP, Jackson D, Barrett JK, et al. Consistency and inconsistency in network meta-  
39 analysis: concepts and models for multi-arm studies. *Res Synth Methods* 2012;3(2):98-  
40 110. doi: 10.1002/jrsm.1044 [published Online First: 2012/06/01]  
41  
42 42. Veroniki AA, Mavridis D, Higgins JP, et al. Characteristics of a loop of evidence that affect  
43 detection and estimation of inconsistency: a simulation study. *BMC Med Res Methodol*  
44 2014;14:106. doi: 10.1186/1471-2288-14-106 [published Online First: 2014/09/23]  
45  
46 43. Veroniki AA, Vasiliadis HS, Higgins JP, et al. Evaluation of inconsistency in networks of  
47 interventions. *Int J Epidemiol* 2013;42(1):332-45. doi: 10.1093/ije/dys222 [published  
48 Online First: 2013/03/20]  
49  
50 44. Begg CB, Mazumdar M. Operating characteristics of a rank correlation test for publication  
51 bias. *Biometrics* 1994;50(4):1088-101. [published Online First: 1994/12/01]  
52  
53 45. Egger M, Davey Smith G, Schneider M, et al. Bias in meta-analysis detected by a simple,  
54 graphical test. *BMJ (Clinical research ed)* 1997;315(7109):629-34. doi:  
55 10.1136/bmj.315.7109.629 [published Online First: 1997/10/06]  
56  
57 46. Salanti G, Del Giovane C, Chaimani A, et al. Evaluating the quality of evidence from a  
58 network meta-analysis. *PLoS One* 2014;9(7):e99682. doi:  
59 10.1371/journal.pone.0099682 [published Online First: 2014/07/06]  
60

## APPENDIX 1

#1 "Diabetes Mellitus, Type 2"[Mesh] OR (Diabetes Mellitus, Noninsulin-Dependent) OR (Diabetes Mellitus, Ketosis Resistant) OR (Ketosis-Resistant Diabetes Mellitus) OR (Diabetes Mellitus, Non Insulin Dependent) OR (Diabetes Mellitus, Non-Insulin-Dependent) OR (Non-Insulin-Dependent Diabetes Mellitus) OR (Diabetes Mellitus, Stable) OR (Stable Diabetes Mellitus) OR (Diabetes Mellitus, Type II) OR(NIDDM) OR (Diabetes Mellitus, Noninsulin Dependent) OR (Diabetes Mellitus, Maturity-Onset) OR (Diabetes Mellitus, Maturity Onset) OR (Maturity-Onset Diabetes Mellitus) OR (Maturity Onset Diabetes Mellitus) OR (MODY) OR (Diabetes Mellitus, Slow-Onset) OR (Diabetes Mellitus, Slow Onset) OR (Slow-Onset Diabetes Mellitus) OR (Type 2 Diabetes Mellitus) OR (Noninsulin-Dependent Diabetes Mellitus) OR (Noninsulin Dependent Diabetes Mellitus) OR (Maturity-Onset Diabetes) OR (Diabetes, Maturity-Onset) OR (Maturity Onset Diabetes) OR (Type 2 Diabetes) OR (Diabetes, Type 2) OR (Diabetes Mellitus, Adult-Onset) OR (Adult-Onset Diabetes Mellitus) OR (Diabetes Mellitus, Adult Onset)

#2 "Primary Health Care"[Mesh] OR (Care, Primary Health) OR (Health Care, Primary) OR (Primary Healthcare) OR (Healthcare, Primary) OR (Primary Care) OR (Care, Primary) or "Physicians, Primary Care"[Mesh] OR (Physician, Primary Care) OR (Primary Care Physician) OR (Primary Care Physicians) OR (Healthy Primary Care) OR "Primary Care Nursing"[Mesh] OR (Care Nursing, Primary) OR (Nursing, Primary Care)

#3 "Community Health Planning"[Mesh] OR (Community Health Plannings) OR (Health Planning, Community) OR (Health Plannings, Community) OR (Planning, Community Health) OR (Plannings, Community Health) OR (Population-Based Planning) OR (Planning, Population-Based) OR (Plannings, Population-Based) OR (Population Based Planning) OR (Population-Based Plannings) OR (Community Health Systems) OR (Community Health System) OR (Health System, Community) OR (Health Systems, Community) OR (System, Community Health) OR (Systems, Community Health)

#4\* randomized controlled trial[pt] OR controlled clinical trial[pt] OR randomized[tiab] OR placebo[tiab] OR clinical trials as topic[mesh:noexp] OR randomly[tiab] OR trial[ti] NOT (animals[mh] NOT humans [mh])

#1 AND #2 AND #3 AND #4

\* Direct link to PubMed with **sensitivity- and precision-maximizing version**(2008 revision). <sup>1</sup> Lefebvre C, Manheimer E, Glanville J. Chapter 6: Searching for studies. In: Higgins J, Green S (editors). Cochrane Handbook for Systematic Reviews of Interventions. Version 5.1.0 (updated March 2011). The Cochrane Collaboration, 2011. Available from **www.cochrane-handbook.org**

# Reporting checklist for protocol of a systematic review.

Based on the PRISMA-P guidelines.

## Instructions to authors

Complete this checklist by entering the page numbers from your manuscript where readers will find each of the items listed below.

Your article may not currently address all the items on the checklist. Please modify your text to include the missing information. If you are certain that an item does not apply, please write "n/a" and provide a short explanation.

Upload your completed checklist as an extra file when you submit to a journal.

In your methods section, say that you used the PRISMA-P reporting guidelines, and cite them as:

Moher D, Shamseer L, Clarke M, Ghersi D, Liberati A, Petticrew M, Shekelle P, Stewart LA. Preferred Reporting Items for Systematic Review and Meta-Analysis Protocols (PRISMA-P) 2015 statement. Syst Rev. 2015;4(1):1.

|                |                     |                                                                                    | Page   |
|----------------|---------------------|------------------------------------------------------------------------------------|--------|
|                |                     | Reporting Item                                                                     | Number |
| Identification | <a href="#">#1a</a> | Identify the report as a protocol of a systematic review                           | 1      |
| Update         | <a href="#">#1b</a> | If the protocol is for an update of a previous systematic review, identify as such | n/a    |

|    |                      |                     |                                                                 |     |
|----|----------------------|---------------------|-----------------------------------------------------------------|-----|
| 1  |                      | <a href="#">#2</a>  | If registered, provide the name of the registry (such as        | 3   |
| 2  |                      |                     | PROSPERO) and registration number                               |     |
| 3  |                      |                     |                                                                 |     |
| 4  |                      |                     |                                                                 |     |
| 5  |                      |                     |                                                                 |     |
| 6  | Contact              | <a href="#">#3a</a> | Provide name, institutional affiliation, e-mail address of all  | 1   |
| 7  |                      |                     | protocol authors; provide physical mailing address of           |     |
| 8  |                      |                     | corresponding author                                            |     |
| 9  |                      |                     |                                                                 |     |
| 10 |                      |                     |                                                                 |     |
| 11 |                      |                     |                                                                 |     |
| 12 |                      |                     |                                                                 |     |
| 13 |                      |                     |                                                                 |     |
| 14 | Contribution         | <a href="#">#3b</a> | Describe contributions of protocol authors and identify the     | 16  |
| 15 |                      |                     | guarantor of the review                                         |     |
| 16 |                      |                     |                                                                 |     |
| 17 |                      |                     |                                                                 |     |
| 18 |                      |                     |                                                                 |     |
| 19 |                      | <a href="#">#4</a>  | If the protocol represents an amendment of a previously         | n/a |
| 20 |                      |                     | completed or published protocol, identify as such and list      |     |
| 21 |                      |                     | changes; otherwise, state plan for documenting important        |     |
| 22 |                      |                     | protocol amendments                                             |     |
| 23 |                      |                     |                                                                 |     |
| 24 |                      |                     |                                                                 |     |
| 25 |                      |                     |                                                                 |     |
| 26 |                      |                     |                                                                 |     |
| 27 |                      |                     |                                                                 |     |
| 28 |                      |                     |                                                                 |     |
| 29 | Sources              | <a href="#">#5a</a> | Indicate sources of financial or other support for the review   | 16  |
| 30 |                      |                     |                                                                 |     |
| 31 |                      |                     |                                                                 |     |
| 32 | Sponsor              | <a href="#">#5b</a> | Provide name for the review funder and / or sponsor             | 16  |
| 33 |                      |                     |                                                                 |     |
| 34 |                      |                     |                                                                 |     |
| 35 |                      |                     |                                                                 |     |
| 36 | Role of sponsor or   | <a href="#">#5c</a> | Describe roles of funder(s), sponsor(s), and / or               | n/a |
| 37 | funder               |                     | institution(s), if any, in developing the protocol              |     |
| 38 |                      |                     |                                                                 |     |
| 39 |                      |                     |                                                                 |     |
| 40 |                      |                     |                                                                 |     |
| 41 | Rationale            | <a href="#">#6</a>  | Describe the rationale for the review in the context of what is | 4   |
| 42 |                      |                     | already known                                                   |     |
| 43 |                      |                     |                                                                 |     |
| 44 |                      |                     |                                                                 |     |
| 45 |                      |                     |                                                                 |     |
| 46 | Objectives           | <a href="#">#7</a>  | Provide an explicit statement of the question(s) the review     | 6-8 |
| 47 |                      |                     | will address with reference to participants, interventions,     |     |
| 48 |                      |                     | comparators, and outcomes (PICO)                                |     |
| 49 |                      |                     |                                                                 |     |
| 50 |                      |                     |                                                                 |     |
| 51 |                      |                     |                                                                 |     |
| 52 |                      |                     |                                                                 |     |
| 53 |                      |                     |                                                                 |     |
| 54 | Eligibility criteria | <a href="#">#8</a>  | Specify the study characteristics (such as PICO, study          | 6-8 |
| 55 |                      |                     | design, setting, time frame) and report characteristics (such   |     |
| 56 |                      |                     |                                                                 |     |
| 57 |                      |                     |                                                                 |     |
| 58 |                      |                     |                                                                 |     |
| 59 |                      |                     |                                                                 |     |
| 60 |                      |                     |                                                                 |     |



|    |                   |                      |                                                                |       |
|----|-------------------|----------------------|----------------------------------------------------------------|-------|
| 1  |                   |                      | as years considered, language, publication status) to be       |       |
| 2  |                   |                      |                                                                |       |
| 3  |                   |                      | used as criteria for eligibility for the review                |       |
| 4  |                   |                      |                                                                |       |
| 5  |                   |                      |                                                                |       |
| 6  | Information       | <a href="#">#9</a>   | Describe all intended information sources (such as             | 9     |
| 7  |                   |                      |                                                                |       |
| 8  | sources           |                      | electronic databases, contact with study authors, trial        |       |
| 9  |                   |                      |                                                                |       |
| 10 |                   |                      | registers or other grey literature sources) with planned dates |       |
| 11 |                   |                      |                                                                |       |
| 12 |                   |                      | of coverage                                                    |       |
| 13 |                   |                      |                                                                |       |
| 14 |                   |                      |                                                                |       |
| 15 | Search strategy   | <a href="#">#10</a>  | Present draft of search strategy to be used for at least one   | Supp. |
| 16 |                   |                      |                                                                |       |
| 17 |                   |                      | electronic database, including planned limits, such that it    | Data  |
| 18 |                   |                      |                                                                |       |
| 19 |                   |                      | could be repeated                                              |       |
| 20 |                   |                      |                                                                |       |
| 21 |                   |                      |                                                                |       |
| 22 |                   |                      |                                                                |       |
| 23 | Study records -   | <a href="#">#11a</a> | Describe the mechanism(s) that will be used to manage          | 9-10  |
| 24 |                   |                      |                                                                |       |
| 25 | data management   |                      | records and data throughout the review                         |       |
| 26 |                   |                      |                                                                |       |
| 27 |                   |                      |                                                                |       |
| 28 | Study records -   | <a href="#">#11b</a> | State the process that will be used for selecting studies      | 10    |
| 29 |                   |                      |                                                                |       |
| 30 | selection process |                      | (such as two independent reviewers) through each phase of      |       |
| 31 |                   |                      |                                                                |       |
| 32 |                   |                      | the review (that is, screening, eligibility and inclusion in   |       |
| 33 |                   |                      |                                                                |       |
| 34 |                   |                      | meta-analysis)                                                 |       |
| 35 |                   |                      |                                                                |       |
| 36 |                   |                      |                                                                |       |
| 37 |                   |                      |                                                                |       |
| 38 | Study records -   | <a href="#">#11c</a> | Describe planned method of extracting data from reports        | 10    |
| 39 |                   |                      |                                                                |       |
| 40 | data collection   |                      | (such as piloting forms, done independently, in duplicate),    |       |
| 41 |                   |                      |                                                                |       |
| 42 | process           |                      | any processes for obtaining and confirming data from           |       |
| 43 |                   |                      |                                                                |       |
| 44 |                   |                      | investigators                                                  |       |
| 45 |                   |                      |                                                                |       |
| 46 |                   |                      |                                                                |       |
| 47 |                   |                      |                                                                |       |
| 48 | Data items        | <a href="#">#12</a>  | List and define all variables for which data will be sought    | 10    |
| 49 |                   |                      |                                                                |       |
| 50 |                   |                      | (such as PICO items, funding sources), any pre-planned         |       |
| 51 |                   |                      |                                                                |       |
| 52 |                   |                      | data assumptions and simplifications                           |       |
| 53 |                   |                      |                                                                |       |
| 54 |                   |                      |                                                                |       |
| 55 |                   |                      |                                                                |       |
| 56 |                   |                      |                                                                |       |
| 57 |                   |                      |                                                                |       |
| 58 |                   |                      |                                                                |       |
| 59 |                   |                      |                                                                |       |
| 60 |                   |                      |                                                                |       |

|    |                    |                      |                                                                                 |       |
|----|--------------------|----------------------|---------------------------------------------------------------------------------|-------|
| 1  | Outcomes and       | <a href="#">#13</a>  | List and define all outcomes for which data will be sought,                     | 8     |
| 2  |                    |                      |                                                                                 |       |
| 3  | prioritization     |                      | including prioritization of main and additional outcomes, with                  |       |
| 4  |                    |                      |                                                                                 |       |
| 5  |                    |                      | rationale                                                                       |       |
| 6  |                    |                      |                                                                                 |       |
| 7  |                    |                      |                                                                                 |       |
| 8  | Risk of bias in    | <a href="#">#14</a>  | Describe anticipated methods for assessing risk of bias of                      | 10    |
| 9  |                    |                      |                                                                                 |       |
| 10 | individual studies |                      | individual studies, including whether this will be done at the                  |       |
| 11 |                    |                      |                                                                                 |       |
| 12 |                    |                      | outcome or study level, or both; state how this information                     |       |
| 13 |                    |                      |                                                                                 |       |
| 14 |                    |                      | will be used in data synthesis                                                  |       |
| 15 |                    |                      |                                                                                 |       |
| 16 | Data synthesis     | <a href="#">#15a</a> | Describe criteria under which study data will be                                | 11-13 |
| 17 |                    |                      |                                                                                 |       |
| 18 |                    |                      | quantitatively synthesised                                                      |       |
| 19 |                    |                      |                                                                                 |       |
| 20 |                    | <a href="#">#15b</a> | If data are appropriate for quantitative synthesis, describe                    | 11-13 |
| 21 |                    |                      |                                                                                 |       |
| 22 |                    |                      | planned summary measures, methods of handling data and                          |       |
| 23 |                    |                      |                                                                                 |       |
| 24 |                    |                      | methods of combining data from studies, including any                           |       |
| 25 |                    |                      |                                                                                 |       |
| 26 |                    |                      | planned exploration of consistency (such as I <sup>2</sup> , Kendall's $\tau$ ) |       |
| 27 |                    |                      |                                                                                 |       |
| 28 |                    | <a href="#">#15c</a> | Describe any proposed additional analyses (such as                              | 13    |
| 29 |                    |                      |                                                                                 |       |
| 30 |                    |                      | sensitivity or subgroup analyses, meta-regression)                              |       |
| 31 |                    |                      |                                                                                 |       |
| 32 |                    | <a href="#">#15d</a> | If quantitative synthesis is not appropriate, describe the type                 | N/A   |
| 33 |                    |                      |                                                                                 |       |
| 34 |                    |                      | of summary planned                                                              |       |
| 35 |                    |                      |                                                                                 |       |
| 36 | Meta-bias(es)      | <a href="#">#16</a>  | Specify any planned assessment of meta-bias(es) (such as                        | 13    |
| 37 |                    |                      |                                                                                 |       |
| 38 |                    |                      | publication bias across studies, selective reporting within                     |       |
| 39 |                    |                      |                                                                                 |       |
| 40 |                    |                      | studies)                                                                        |       |
| 41 |                    |                      |                                                                                 |       |
| 42 | Confidence in      | <a href="#">#17</a>  | Describe how the strength of the body of evidence will be                       | 14    |
| 43 |                    |                      |                                                                                 |       |
| 44 | cumulative         |                      | assessed (such as GRADE)                                                        |       |
| 45 |                    |                      |                                                                                 |       |
| 46 | evidence           |                      |                                                                                 |       |
| 47 |                    |                      |                                                                                 |       |
| 48 |                    |                      |                                                                                 |       |
| 49 |                    |                      |                                                                                 |       |
| 50 |                    |                      |                                                                                 |       |
| 51 |                    |                      |                                                                                 |       |
| 52 |                    |                      |                                                                                 |       |
| 53 |                    |                      |                                                                                 |       |
| 54 |                    |                      |                                                                                 |       |
| 55 |                    |                      |                                                                                 |       |
| 56 |                    |                      |                                                                                 |       |
| 57 |                    |                      |                                                                                 |       |
| 58 |                    |                      |                                                                                 |       |
| 59 |                    |                      |                                                                                 |       |
| 60 |                    |                      |                                                                                 |       |

1 The PRISMA-P checklist is distributed under the terms of the Creative Commons Attribution License  
2  
3 CC-BY 4.0. This checklist can be completed online using <https://www.goodreports.org/>, a tool made  
4  
5 by the [EQUATOR Network](#) in collaboration with [Penelope.ai](#)  
6  
7  
8  
9  
10  
11  
12  
13  
14  
15  
16  
17  
18  
19  
20  
21  
22  
23  
24  
25  
26  
27  
28  
29  
30  
31  
32  
33  
34  
35  
36  
37  
38  
39  
40  
41  
42  
43  
44  
45  
46  
47  
48  
49  
50  
51  
52  
53  
54  
55  
56  
57  
58  
59  
60

For peer review only

# BMJ Open

## Effectiveness of non-pharmacological strategies in the management of type 2 diabetes in primary care: a protocol for a systematic review and network meta-analysis

|                                 |                                                                                                                                                                                                                                                                                                                                                                                                                                                                                                                                                                                                                                                                                                                                                                                                                                                                                                                                                                                                                           |
|---------------------------------|---------------------------------------------------------------------------------------------------------------------------------------------------------------------------------------------------------------------------------------------------------------------------------------------------------------------------------------------------------------------------------------------------------------------------------------------------------------------------------------------------------------------------------------------------------------------------------------------------------------------------------------------------------------------------------------------------------------------------------------------------------------------------------------------------------------------------------------------------------------------------------------------------------------------------------------------------------------------------------------------------------------------------|
| Journal:                        | <i>BMJ Open</i>                                                                                                                                                                                                                                                                                                                                                                                                                                                                                                                                                                                                                                                                                                                                                                                                                                                                                                                                                                                                           |
| Manuscript ID                   | bmjopen-2019-034481.R1                                                                                                                                                                                                                                                                                                                                                                                                                                                                                                                                                                                                                                                                                                                                                                                                                                                                                                                                                                                                    |
| Article Type:                   | Protocol                                                                                                                                                                                                                                                                                                                                                                                                                                                                                                                                                                                                                                                                                                                                                                                                                                                                                                                                                                                                                  |
| Date Submitted by the Author:   | 26-Nov-2019                                                                                                                                                                                                                                                                                                                                                                                                                                                                                                                                                                                                                                                                                                                                                                                                                                                                                                                                                                                                               |
| Complete List of Authors:       | Leite, Renata; Sao Paulo State University Julio de Mesquita Filho Botucatu Campus Faculty of Medicine, Department of Internal Medicine Banzato , Luísa ; Sao Paulo State University Julio de Mesquita Filho Botucatu Campus Faculty of Medicine, Department of Internal Medicine Galendi, Julia; Sao Paulo State University Julio de Mesquita Filho Botucatu Campus Institute of Biosciences, Department of Internal Medicine<br>Mendes, Adriana; Sao Paulo State University Julio de Mesquita Filho Botucatu Campus Faculty of Medicine, Department of Internal Medicine Bolfi, Fernanda; Sao Paulo State University Julio de Mesquita Filho Botucatu Campus Faculty of Medicine, Department of Internal Medicine Veroniki, Areti-Angeliki; University of Ioannina, Hygiene and Epidemiology<br>Thabane, Lehana ; McMaster University, Clinical Epidemiology & Biostatistics<br>Nunes-Nogueira, Vania; Sao Paulo State University Julio de Mesquita Filho Botucatu Campus Faculty of Medicine, ; Botucatu Medical School |
| <b>Primary Subject Heading</b>: | Diabetes and endocrinology                                                                                                                                                                                                                                                                                                                                                                                                                                                                                                                                                                                                                                                                                                                                                                                                                                                                                                                                                                                                |
| Secondary Subject Heading:      | Evidence based practice                                                                                                                                                                                                                                                                                                                                                                                                                                                                                                                                                                                                                                                                                                                                                                                                                                                                                                                                                                                                   |
| Keywords:                       | diabetes mellitus type 2, primary health care, systematic review, network meta-analysis.                                                                                                                                                                                                                                                                                                                                                                                                                                                                                                                                                                                                                                                                                                                                                                                                                                                                                                                                  |
|                                 |                                                                                                                                                                                                                                                                                                                                                                                                                                                                                                                                                                                                                                                                                                                                                                                                                                                                                                                                                                                                                           |

SCHOLARONE™  
Manuscripts

1  
2  
3 **Effectiveness of non-pharmacological strategies in the management of type 2**  
4 **diabetes in primary care: a protocol for a systematic review and network meta-**  
5 **analysis**  
6  
7  
8

9 Renata Giacomini Oliveira Ferreira Leite<sup>1</sup>, Luísa Rocco Banzato<sup>1</sup>, Júlia Simões Corrêa  
10 Galendi<sup>1</sup>, Adriana Lúcia Mendes<sup>1</sup>, Fernanda Bolfi<sup>1</sup>, Areti Angeliki Veroniki<sup>2,3,4</sup>,  
11 Lehana Thabane<sup>6,7</sup>, Vania dos Santos Nunes–Nogueira<sup>1</sup>  
12  
13

14 <sup>1</sup>Department of Internal Medicine – São Paulo State University/UNESP, Medical School,  
15 Sao Paulo, Brazil  
16

17 <sup>2</sup>Department of Primary Education, School of Education, University of Ioannina,  
18 Ioannina, Greece  
19

20 <sup>3</sup>Knowledge Translation Program, Li Ka Shing Knowledge Institute, St. Michael's  
21 Hospital, Unity Health Toronto, Toronto, Ontario, Canada  
22

23 <sup>4</sup>Institute of Reproductive and Developmental Biology, Department of Surgery & Cancer,  
24 Faculty of Medicine, Imperial College, London, United Kingdom  
25

26 <sup>6</sup>Department of Health Research Methods, Evidence, and Impact, McMaster University,  
27 Hamilton, ON, Canada  
28

29 <sup>7</sup>Departments of Pediatrics and Anesthesia, McMaster University, Hamilton, ON, Canada  
30  
31

32 E-mail address

33 Leite RGOF: [renataocchiuto@ig.com.br](mailto:renataocchiuto@ig.com.br)

34 Banzato LR: [lubanzato@gmail.com](mailto:lubanzato@gmail.com)

35 Galendi JSC: [jsimoescorrea@gmail.com](mailto:jsimoescorrea@gmail.com)

36 Mendes AL: [mendes.adrianalucia@gmail.com](mailto:mendes.adrianalucia@gmail.com)

37 Bolfi F: [febolfi@gmail.com](mailto:febolfi@gmail.com)

38 Veroniki A: [averoniki@uoi.gr](mailto:averoniki@uoi.gr)

39 Thabane L: [ThabanL@mcmaster.ca](mailto:ThabanL@mcmaster.ca)  
40  
41  
42  
43  
44

45 **Corresponding Author:**

46 Vania dos Santos Nunes Nogueira

47 Departamento de Clínica Médica – FMB – UNESP

48 Avenida Professor Mário Rubens Guimarães Montenegro s/n, Bairro UNESP, Campus Botucatu,  
49 Botucatu-SP 18618-687, Brazil  
50

51 Phone: (55 14) 3880 11 71. Fax: (55 14) 3880 16 67

52 E-mail: [vania.nunes-nogueira@unesp.br](mailto:vania.nunes-nogueira@unesp.br)

53 Word count: 3276  
54  
55  
56  
57  
58  
59  
60

## ABSTRACT

**Introduction:** Despite the increasing number of drugs and various guidelines on the management of type 2 diabetes mellitus (T2DM), several patients continue with the disease uncontrolled. There are several non-pharmacological treatments available for managing T2DM, but various of them have never been compared directly to determine the best strategies.

**Objective:** This study will evaluate the comparative effects of non-pharmacological strategies in the management of T2DM in primary care or community settings.

**Methods and Analysis:** We will perform a systematic review and network meta-analysis (NMA), and will include randomized controlled trials if one of the following interventions were applied in adult patients with T2DM: nutritional therapy, physical activity, psychological interventions, social interventions, multidisciplinary lifestyle interventions, diabetes self-management education and support (DSMES), technology-enabled DSMES, interventions delivered only either by pharmacists or by nurses, self-blood glucose monitoring in non-insulin-treated T2DM, health coaching, benchmarking, and usual care. The primary outcome will be glycemic control (glycated hemoglobin [HbA1c] [%]), and the secondary outcomes will be weight loss, quality of life, patient satisfaction, frequency of cardiovascular events and deaths, number of patients in each group with HbA1c <7, adverse events, and medication adherence. We have developed search strategies for Embase, Medline, Latin American and Caribbean Health Sciences Literature, Cochrane Central Register of Controlled Trials, Trip database, Scopus, Web of Science, Cumulative Index to Nursing and Allied Health Literature (CINAHL) Australasian Medical Index, and Chinese Biomedical Literature Database. Four reviewers will assess the studies for their eligibility and their risk of bias in pairs and independently. An NMA will be performed using a Bayesian hierarchical model, and the treatment

1  
2  
3 hierarchy will be obtained using the surface under the cumulative ranking curve. To  
4  
5 determine our confidence in an overall treatment ranking from the NMA, we will follow  
6  
7 the Grading of Recommendations Assessment, Development and Evaluation (GRADE)  
8  
9 approach.  
10  
11  
12

13 **Ethics and Dissemination:** As no primary data collection will be undertaken, no formal  
14  
15 ethical assessment is required. We plan to present the results of this systematic review in  
16  
17 a peer-reviewed scientific journal, conferences, and the popular press.  
18  
19

20 **Prospero Registration Number:** Our systematic review protocol has been registered  
21  
22 with the International Prospective Register of Systematic Reviews on October 30, 2019  
23  
24 (registration number CRD42019127856).  
25

26 **Key words:** diabetes mellitus type 2, primary health care, systematic review, network  
27  
28 meta-analysis.  
29  
30

31 **Strengths and limitations of this study:**  
32

- 33 • Network meta-analysis (NMA) allows the simultaneous comparison of multiple  
34  
35 treatment alternatives in a single model.  
36  
37
- 38 • NMA improves precision of treatment effect estimates, ranks treatments  
39  
40 according to their effectiveness, and can assess the impact of observed treatment  
41  
42 effects in the evidence network.  
43  
44
- 45 • A potential limitation of this study can be missing outcome data, which may bias  
46  
47 our findings. In such a case, valid imputation methods will be applied and  
48  
49 robustness of results will be explored.  
50  
51
- 52 • Intransitivity in indirect comparisons may be another potential limitation, which  
53  
54 can impact the validity of our NMA results. In case of intransitivity, reasons for  
55  
56 this will be explored.  
57  
58  
59  
60

## INTRODUCTION

Despite the increasing number of drugs available and various guidelines on the management of type 2 diabetes mellitus (T2DM), an expressive number of patients continue with the disease uncontrolled. In a multicenter, cross-sectional, epidemiological, questionnaire-based study conducted in nine Latin American countries, 56.8% of patients with T2DM had poor glycemic control (hemoglobin A1c [HbA1c]  $\geq 7\%$ ).<sup>1</sup> In the United State, according to a survey performed between 1998 and 2002, only 42.3% of adults had HbA1c levels less than 7%, and 14% had HbA1c levels greater than 10%.<sup>2</sup>

Therefore, to increase the percentage of diabetic patients with the disease controlled and thereby reduce the number of deaths and morbidities related to this disease, non-pharmacological strategies that are complementary to the drug treatment have been studied in the management of T2DM.

Randomized clinical trials (RCTs) have shown that medical nutritional therapy and physical activity, considered as non-pharmacological treatments of T2DM, effectively improve glycemic control and other metabolic outcomes in patients with T2DM.<sup>3 4</sup> Additionally, a systematic review of lifestyle weight loss interventions in overweight and obese adults with T2DM showed that a weight loss of  $>5\%$  is considered necessary for its beneficial effects on HbA1c, lipids, and blood pressure, and to achieve this level of weight loss, intense interventions, including energy restriction, regular physical activity, and frequent contact with healthcare professionals, are required.<sup>5</sup>

Meanwhile, other non-pharmacological strategies have been introduced in diabetes treatment. Some studies in T2DM have shown that programs focused on counseling, therapy compliance, explanation of possible adverse events, and patient empowerment are associated with better glycemic and quality-of-life controls and,



1  
2  
3 consequently, lower follow-up costs.<sup>6-9</sup> A systematic review of the effects of group-based,  
4 patient-centered training on clinical, lifestyle, and psychosocial outcomes in patients with  
5 T2DM showed significant reductions in HbA1c in favor of group-based interventions.<sup>10</sup>  
6  
7 Similarly, other strategies with similar objectives have also been reported in the  
8 management of T2DM, such as psychological<sup>11</sup> and social interventions.<sup>12</sup>  
9  
10  
11  
12  
13  
14

15 However, despite the evidence of effectiveness of these non-pharmacological  
16 strategies in T2DM metabolic control, in primary healthcare settings, some RCTs have  
17 not achieved similar results.<sup>13-15</sup> In a pragmatic clustered randomized controlled trial  
18 conducted in public community health centers in Cape Town involving 1,570 adults with  
19 T2DM, a group diabetes education program did not show greater improvement in  
20 glycemia control compared with usual care.<sup>16</sup>  
21  
22  
23  
24  
25  
26  
27  
28  
29

30 Since there are several different non-pharmacological strategies for the  
31 management of T2DM and with contradictory results in some healthcare settings, we aim  
32 to answer the following questions: In primary care, are the non-pharmacological  
33 strategies effective in the glyceic control of adults with T2DM? Which of these  
34 strategies have the best glyceic control?  
35  
36  
37  
38  
39  
40  
41

42 Hence, the objective of this study is to evaluate the comparative effects of non-  
43 pharmacological strategies in the management of T2DM in primary care or community  
44 settings.  
45  
46  
47  
48  
49

## 50 **METHODS AND DESIGN**

51  
52

53 A systematic review and network meta-analysis (NMA) for the assessment of the  
54 effectiveness of all non-pharmacological strategies available for T2DM in diabetes  
55 control will be performed.  
56  
57  
58  
59  
60

1  
2  
3 NMA combines direct and indirect evidence; therefore, the relative effectiveness  
4 of two non-pharmacological strategies can be estimated even if studies that directly  
5 compared them did not exist.  
6  
7  
8  
9

10 Denoting nutritional therapy, social support, and usual care as non-  
11 pharmacological strategies A, B, and C, respectively, an indirect comparison (AB) can be  
12 obtained by subtracting the meta-analytic estimates of all studies of nutritional therapy  
13 versus usual care (AC) from the estimate of all studies of social support versus usual care  
14 (BC).<sup>17</sup>  
15  
16  
17  
18  
19  
20  
21  
22

23 Traditional meta-analyses are limited to the comparisons of two groups, failing  
24 to generate a complete picture of the effectiveness of non-pharmacological treatments for  
25 T2DM. In the current review, since there are more than 10 strategies of interest and for  
26 most there are no trials involving a direct comparison, the NMA was selected a substitute  
27 of the traditional meta-analysis.  
28  
29  
30  
31  
32  
33  
34

35 The protocol of this review has been registered with the International Prospective  
36 Register of Systematic Reviews (PROSPERO) database (registration number:  
37 CRD42019127856), and it was developed following the Preferred Reporting Items for  
38 Systematic Reviews and Meta-Analyses for Protocols (PRISMA-P).<sup>18</sup>  
39  
40  
41  
42  
43  
44

#### 45 **Patient and Public Involvement**

46  
47

48 We will not directly include patient-level data in this study, but the protocol  
49 development, priority of the research question, choice of outcome measures, and type of  
50 intervention have been informed through discussions with the members of the Brazilian  
51 Health Ministry and a group of patients with T2DM during follow-up in a tertiary  
52 Brazilian healthcare; both identified this study as a priority area for managing patients  
53 with T2DM in primary healthcare.  
54  
55  
56  
57  
58  
59  
60

## Eligibility Criteria

RCTs meeting the “PICOT” structure described below will be included in this study.

### Participants (P)

Adult patients, over 18 years old, diagnosed with T2DM according to the American Diabetes Association (fasting glycemia greater than or equal to 126 mg/dL, glycemia greater than 200 mg/dL associated with classic DM symptoms, glycemia 2 hours after overload with 75 grams of glucose greater than or equal to 200 mg/dL, HbA1c greater than or equal to 6.5%) will be included in the study.<sup>6</sup>

### Definitions of interventions (I)

All non-pharmacological and patient-mediated strategies<sup>19</sup> aimed at promoting better control of the disease for diabetic patients will be considered as interventions. The strategies can be implemented as either standalone or adjunct to the pharmacotherapy of T2DM. Regarding adjunct treatment, both groups must have received similar drug treatment.

Based on our previous search in the literature, the interventions may be (1) nutritional therapy (dietary quality or energy restriction),<sup>20</sup> (2) physical activity program (running, walking, bicycling, swimming, resistance training, yoga, Tai chi),<sup>20</sup> (3) psychological interventions (emotion-focused or cognition-focused),<sup>11</sup> (4) social network interventions (friends, families, and peers),<sup>12</sup> (5) multidisciplinary lifestyle interventions (an intervention that combines at least two of the following modalities: physical activity, nutritional therapy, social or psychological support),<sup>21</sup> (6) diabetes self-management

1  
2  
3 education and support (DSMES),<sup>22</sup> (7) technology-enabled DSMES (mobile phones,  
4 secure messaging, web-based information),<sup>23</sup>(8) interventions delivered only or mainly  
5 by pharmacists (DSMES and/or pharmacy management),<sup>24</sup> (9) interventions delivered  
6 only or mainly by nurses (DSMES and/or pharmacy management),<sup>25</sup> (10) self-blood  
7 glucose monitoring in non-insulin-treated T2DM,<sup>26</sup> (11) health coaching,<sup>27</sup> and (12)  
8 benchmarking.<sup>28</sup>  
9

10  
11  
12 The intervention must have been performed at the primary care (or in community  
13 settings), with a minimum follow-up period of 6 months.  
14  
15

### 16 17 18 **Comparison (C)**

19  
20  
21  
22  
23  
24  
25  
26  
27  
28  
29  
30  
31  
32  
33  
34  
35  
36  
37  
38  
39  
40  
41  
42  
43  
44  
45  
46  
47  
48  
49  
50  
51  
52  
53  
54  
55  
56  
57  
58  
59  
60  
61  
62  
63  
64  
65  
66  
67  
68  
69  
70  
71  
72  
73  
74  
75  
76  
77  
78  
79  
80  
81  
82  
83  
84  
85  
86  
87  
88  
89  
90  
91  
92  
93  
94  
95  
96  
97  
98  
99  
100  
101  
102  
103  
104  
105  
106  
107  
108  
109  
110  
111  
112  
113  
114  
115  
116  
117  
118  
119  
120  
121  
122  
123  
124  
125  
126  
127  
128  
129  
130  
131  
132  
133  
134  
135  
136  
137  
138  
139  
140  
141  
142  
143  
144  
145  
146  
147  
148  
149  
150  
151  
152  
153  
154  
155  
156  
157  
158  
159  
160  
161  
162  
163  
164  
165  
166  
167  
168  
169  
170  
171  
172  
173  
174  
175  
176  
177  
178  
179  
180  
181  
182  
183  
184  
185  
186  
187  
188  
189  
190  
191  
192  
193  
194  
195  
196  
197  
198  
199  
200  
201  
202  
203  
204  
205  
206  
207  
208  
209  
210  
211  
212  
213  
214  
215  
216  
217  
218  
219  
220  
221  
222  
223  
224  
225  
226  
227  
228  
229  
230  
231  
232  
233  
234  
235  
236  
237  
238  
239  
240  
241  
242  
243  
244  
245  
246  
247  
248  
249  
250  
251  
252  
253  
254  
255  
256  
257  
258  
259  
260  
261  
262  
263  
264  
265  
266  
267  
268  
269  
270  
271  
272  
273  
274  
275  
276  
277  
278  
279  
280  
281  
282  
283  
284  
285  
286  
287  
288  
289  
290  
291  
292  
293  
294  
295  
296  
297  
298  
299  
300  
301  
302  
303  
304  
305  
306  
307  
308  
309  
310  
311  
312  
313  
314  
315  
316  
317  
318  
319  
320  
321  
322  
323  
324  
325  
326  
327  
328  
329  
330  
331  
332  
333  
334  
335  
336  
337  
338  
339  
340  
341  
342  
343  
344  
345  
346  
347  
348  
349  
350  
351  
352  
353  
354  
355  
356  
357  
358  
359  
360  
361  
362  
363  
364  
365  
366  
367  
368  
369  
370  
371  
372  
373  
374  
375  
376  
377  
378  
379  
380  
381  
382  
383  
384  
385  
386  
387  
388  
389  
390  
391  
392  
393  
394  
395  
396  
397  
398  
399  
400  
401  
402  
403  
404  
405  
406  
407  
408  
409  
410  
411  
412  
413  
414  
415  
416  
417  
418  
419  
420  
421  
422  
423  
424  
425  
426  
427  
428  
429  
430  
431  
432  
433  
434  
435  
436  
437  
438  
439  
440  
441  
442  
443  
444  
445  
446  
447  
448  
449  
450  
451  
452  
453  
454  
455  
456  
457  
458  
459  
460  
461  
462  
463  
464  
465  
466  
467  
468  
469  
470  
471  
472  
473  
474  
475  
476  
477  
478  
479  
480  
481  
482  
483  
484  
485  
486  
487  
488  
489  
490  
491  
492  
493  
494  
495  
496  
497  
498  
499  
500  
501  
502  
503  
504  
505  
506  
507  
508  
509  
510  
511  
512  
513  
514  
515  
516  
517  
518  
519  
520  
521  
522  
523  
524  
525  
526  
527  
528  
529  
530  
531  
532  
533  
534  
535  
536  
537  
538  
539  
540  
541  
542  
543  
544  
545  
546  
547  
548  
549  
550  
551  
552  
553  
554  
555  
556  
557  
558  
559  
560  
561  
562  
563  
564  
565  
566  
567  
568  
569  
570  
571  
572  
573  
574  
575  
576  
577  
578  
579  
580  
581  
582  
583  
584  
585  
586  
587  
588  
589  
590  
591  
592  
593  
594  
595  
596  
597  
598  
599  
600  
601  
602  
603  
604  
605  
606  
607  
608  
609  
610  
611  
612  
613  
614  
615  
616  
617  
618  
619  
620  
621  
622  
623  
624  
625  
626  
627  
628  
629  
630  
631  
632  
633  
634  
635  
636  
637  
638  
639  
640  
641  
642  
643  
644  
645  
646  
647  
648  
649  
650  
651  
652  
653  
654  
655  
656  
657  
658  
659  
660  
661  
662  
663  
664  
665  
666  
667  
668  
669  
670  
671  
672  
673  
674  
675  
676  
677  
678  
679  
680  
681  
682  
683  
684  
685  
686  
687  
688  
689  
690  
691  
692  
693  
694  
695  
696  
697  
698  
699  
700  
701  
702  
703  
704  
705  
706  
707  
708  
709  
710  
711  
712  
713  
714  
715  
716  
717  
718  
719  
720  
721  
722  
723  
724  
725  
726  
727  
728  
729  
730  
731  
732  
733  
734  
735  
736  
737  
738  
739  
740  
741  
742  
743  
744  
745  
746  
747  
748  
749  
750  
751  
752  
753  
754  
755  
756  
757  
758  
759  
760  
761  
762  
763  
764  
765  
766  
767  
768  
769  
770  
771  
772  
773  
774  
775  
776  
777  
778  
779  
780  
781  
782  
783  
784  
785  
786  
787  
788  
789  
790  
791  
792  
793  
794  
795  
796  
797  
798  
799  
800  
801  
802  
803  
804  
805  
806  
807  
808  
809  
810  
811  
812  
813  
814  
815  
816  
817  
818  
819  
820  
821  
822  
823  
824  
825  
826  
827  
828  
829  
830  
831  
832  
833  
834  
835  
836  
837  
838  
839  
840  
841  
842  
843  
844  
845  
846  
847  
848  
849  
850  
851  
852  
853  
854  
855  
856  
857  
858  
859  
860  
861  
862  
863  
864  
865  
866  
867  
868  
869  
870  
871  
872  
873  
874  
875  
876  
877  
878  
879  
880  
881  
882  
883  
884  
885  
886  
887  
888  
889  
890  
891  
892  
893  
894  
895  
896  
897  
898  
899  
900  
901  
902  
903  
904  
905  
906  
907  
908  
909  
910  
911  
912  
913  
914  
915  
916  
917  
918  
919  
920  
921  
922  
923  
924  
925  
926  
927  
928  
929  
930  
931  
932  
933  
934  
935  
936  
937  
938  
939  
940  
941  
942  
943  
944  
945  
946  
947  
948  
949  
950  
951  
952  
953  
954  
955  
956  
957  
958  
959  
960  
961  
962  
963  
964  
965  
966  
967  
968  
969  
970  
971  
972  
973  
974  
975  
976  
977  
978  
979  
980  
981  
982  
983  
984  
985  
986  
987  
988  
989  
990  
991  
992  
993  
994  
995  
996  
997  
998  
999  
1000

Comparator will be considered an usual care of T2DM (drug treatment associated with a general orientation regarding lifestyle changes provided by a general practitioner) or another intervention described above. An episodic evaluation with a nutritionist, nurse, physical trainer or educator in diabetes, which provides a general orientation regarding changes in lifestyle, will be considered usual care if the patients are not provided with subsequent follow-up.

This protocol differs from our previous published protocol<sup>29</sup> because in the current systematic review, we will consider all non-pharmacological strategies for T2DM in primary care. Additionally, here, we will perform direct and indirect comparisons of all strategies. In the previous protocol, only nutritional therapy has been evaluated in direct comparisons (only nutritional therapy versus usual care).

### 53 54 55 **Type of outcomes (O)**

56  
57  
58  
59  
60  
61  
62  
63  
64  
65  
66  
67  
68  
69  
70  
71  
72  
73  
74  
75  
76  
77  
78  
79  
80  
81  
82  
83  
84  
85  
86  
87  
88  
89  
90  
91  
92  
93  
94  
95  
96  
97  
98  
99  
100  
101  
102  
103  
104  
105  
106  
107  
108  
109  
110  
111  
112  
113  
114  
115  
116  
117  
118  
119  
120  
121  
122  
123  
124  
125  
126  
127  
128  
129  
130  
131  
132  
133  
134  
135  
136  
137  
138  
139  
140  
141  
142  
143  
144  
145  
146  
147  
148  
149  
150  
151  
152  
153  
154  
155  
156  
157  
158  
159  
160  
161  
162  
163  
164  
165  
166  
167  
168  
169  
170  
171  
172  
173  
174  
175  
176  
177  
178  
179  
180  
181  
182  
183  
184  
185  
186  
187  
188  
189  
190  
191  
192  
193  
194  
195  
196  
197  
198  
199  
200  
201  
202  
203  
204  
205  
206  
207  
208  
209  
210  
211  
212  
213  
214  
215  
216  
217  
218  
219  
220  
221  
222  
223  
224  
225  
226  
227  
228  
229  
230  
231  
232  
233  
234  
235  
236  
237  
238  
239  
240  
241  
242  
243  
244  
245  
246  
247  
248  
249  
250  
251  
252  
253  
254  
255  
256  
257  
258  
259  
260  
261  
262  
263  
264  
265  
266  
267  
268  
269  
270  
271  
272  
273  
274  
275  
276  
277  
278  
279  
280  
281  
282  
283  
284  
285  
286  
287  
288  
289  
290  
291  
292  
293  
294  
295  
296  
297  
298  
299  
300  
301  
302  
303  
304  
305  
306  
307  
308  
309  
310  
311  
312  
313  
314  
315  
316  
317  
318  
319  
320  
321  
322  
323  
324  
325  
326  
327  
328  
329  
330  
331  
332  
333  
334  
335  
336  
337  
338  
339  
340  
341  
342  
343  
344  
345  
346  
347  
348  
349  
350  
351  
352  
353  
354  
355  
356  
357  
358  
359  
360  
361  
362  
363  
364  
365  
366  
367  
368  
369  
370  
371  
372  
373  
374  
375  
376  
377  
378  
379  
380  
381  
382  
383  
384  
385  
386  
387  
388  
389  
390  
391  
392  
393  
394  
395  
396  
397  
398  
399  
400  
401  
402  
403  
404  
405  
406  
407  
408  
409  
410  
411  
412  
413  
414  
415  
416  
417  
418  
419  
420  
421  
422  
423  
424  
425  
426  
427  
428  
429  
430  
431  
432  
433  
434  
435  
436  
437  
438  
439  
440  
441  
442  
443  
444  
445  
446  
447  
448  
449  
450  
451  
452  
453  
454  
455  
456  
457  
458  
459  
460  
461  
462  
463  
464  
465  
466  
467  
468  
469  
470  
471  
472  
473  
474  
475  
476  
477  
478  
479  
480  
481  
482  
483  
484  
485  
486  
487  
488  
489  
490  
491  
492  
493  
494  
495  
496  
497  
498  
499  
500  
501  
502  
503  
504  
505  
506  
507  
508  
509  
510  
511  
512  
513  
514  
515  
516  
517  
518  
519  
520  
521  
522  
523  
524  
525  
526  
527  
528  
529  
530  
531  
532  
533  
534  
535  
536  
537  
538  
539  
540  
541  
542  
543  
544  
545  
546  
547  
548  
549  
550  
551  
552  
553  
554  
555  
556  
557  
558  
559  
560  
561  
562  
563  
564  
565  
566  
567  
568  
569  
570  
571  
572  
573  
574  
575  
576  
577  
578  
579  
580  
581  
582  
583  
584  
585  
586  
587  
588  
589  
590  
591  
592  
593  
594  
595  
596  
597  
598  
599  
600  
601  
602  
603  
604  
605  
606  
607  
608  
609  
610  
611  
612  
613  
614  
615  
616  
617  
618  
619  
620  
621  
622  
623  
624  
625  
626  
627  
628  
629  
630  
631  
632  
633  
634  
635  
636  
637  
638  
639  
640  
641  
642  
643  
644  
645  
646  
647  
648  
649  
650  
651  
652  
653  
654  
655  
656  
657  
658  
659  
660  
661  
662  
663  
664  
665  
666  
667  
668  
669  
670  
671  
672  
673  
674  
675  
676  
677  
678  
679  
680  
681  
682  
683  
684  
685  
686  
687  
688  
689  
690  
691  
692  
693  
694  
695  
696  
697  
698  
699  
700  
701  
702  
703  
704  
705  
706  
707  
708  
709  
710  
711  
712  
713  
714  
715  
716  
717  
718  
719  
720  
721  
722  
723  
724  
725  
726  
727  
728  
729  
730  
731  
732  
733  
734  
735  
736  
737  
738  
739  
740  
741  
742  
743  
744  
745  
746  
747  
748  
749  
750  
751  
752  
753  
754  
755  
756  
757  
758  
759  
760  
761  
762  
763  
764  
765  
766  
767  
768  
769  
770  
771  
772  
773  
774  
775  
776  
777  
778  
779  
780  
781  
782  
783  
784  
785  
786  
787  
788  
789  
790  
791  
792  
793  
794  
795  
796  
797  
798  
799  
800  
801  
802  
803  
804  
805  
806  
807  
808  
809  
810  
811  
812  
813  
814  
815  
816  
817  
818  
819  
820  
821  
822  
823  
824  
825  
826  
827  
828  
829  
830  
831  
832  
833  
834  
835  
836  
837  
838  
839  
840  
841  
842  
843  
844  
845  
846  
847  
848  
849  
850  
851  
852  
853  
854  
855  
856  
857  
858  
859  
860  
861  
862  
863  
864  
865  
866  
867  
868  
869  
870  
871  
872  
873  
874  
875  
876  
877  
878  
879  
880  
881  
882  
883  
884  
885  
886  
887  
888  
889  
890  
891  
892  
893  
894  
895  
896  
897  
898  
899  
900  
901  
902  
903  
904  
905  
906  
907  
908  
909  
910  
911  
912  
913  
914  
915  
916  
917  
918  
919  
920  
921  
922  
923  
924  
925  
926  
927  
928  
929  
930  
931  
932  
933  
934  
935  
936  
937  
938  
939  
940  
941  
942  
943  
944  
945  
946  
947  
948  
949  
950  
951  
952  
953  
954  
955  
956  
957  
958  
959  
960  
961  
962  
963  
964  
965  
966  
967  
968  
969  
970  
971  
972  
973  
974  
975  
976  
977  
978  
979  
980  
981  
982  
983  
984  
985  
986  
987  
988  
989  
990  
991  
992  
993  
994  
995  
996  
997  
998  
999  
1000

The primary outcome will be glycemic control (HbA1c [%]). The secondary outcomes will be anthropometric measurements (measured by weight or waist

1  
2  
3 circumference [WC], or body mass index [BMI]), quality of life, patient satisfaction,  
4  
5 frequency of cardiovascular events and deaths, number of patients in each group with  
6  
7 HbA1c <7, adverse events related to non-pharmacological strategies, and medication  
8  
9 adherence.  
10  
11  
12

### 13 **Time-frame of outcome evaluation (T)**

14  
15

16 We will include only studies with follow up greater than 6 months. The outcomes  
17  
18 will be evaluated at 6 to 12 months and greater than 12 months. For trials that had more  
19  
20 than one time of outcome evaluation, we will consider the longest time point.  
21  
22

### 23 **Exclusion Criteria**

24  
25

26 We will exclude trials that were conducted in settings other than the primary care  
27  
28 or community settings, trials whose aim was to compare the effectiveness of  
29  
30 pharmacological treatments, trials in which the intervention was any type of surgery to  
31  
32 lose weight, trials with follow-up period less than 6 months, and trials that included  
33  
34 predominantly participants with type 1 DM, gestational diabetes, or diabetes secondary  
35  
36 to medication or a chronic disease.  
37  
38  
39  
40

### 41 **Data sources and search strategy**

42  
43  
44

45 Search strategies have been created and adapted to the following electronic health  
46  
47 databases: Embase (by Elsevier, 1980–2019), Medline (by PubMed, 1966–2019), Latin  
48  
49 American and Caribbean Health Sciences Literature (by Virtual Health Library, 1982–  
50  
51 2019), and Controlled Clinical Trials of the Cochrane Collaboration (Cochrane Central  
52  
53 Register of Controlled Trials). We have used the following index terms and their  
54  
55 synonyms: Diabetes Mellitus, Type 2; Primary Health Care; and Community Health  
56  
57 Planning. Language or year restrictions will not be considered in this study. We have used  
58  
59  
60

1  
2  
3 the validated RCT filters created by the Cochrane Collaboration for Medline and Embase.  
4  
5 A draft Medline search strategy is included in Appendix 1.  
6  
7

8 The following databases will also be searched for eligible studies: Trip database,  
9  
10 Scopus, Web of Science, CINAHL, Australasian Medical Index, and Chinese Biomedical  
11  
12 Literature Database. We will also search for studies on ClinicalTrials.gov and the gray  
13  
14 literature through conferences, published abstracts, and dissertations.  
15  
16

17  
18 References of relevant primary or secondary studies will be searched to identify  
19  
20 additional eligible studies. We will use the Endnote software to download all references  
21  
22 and remove duplicates. The initial screening of abstracts and titles will be performed  
23  
24 using the software Rayyan QCRI.<sup>30</sup>  
25  
26

### 27 28 **Study selection**

29  
30 Four reviewers independently will perform in pairs the assessment of titles and  
31  
32 abstracts (RGOFL, LRB, JSCG, VSNN), and the studies potentially eligible for inclusion  
33  
34 in the review will be selected for full reading and subsequently assessed for adequacy to  
35  
36 the proposed PICOT In case of disagreement, a consensus meeting before the final  
37  
38 decision will be held.  
39  
40  
41

### 42 43 **Data extraction**

44  
45 For each selected trial, the same four reviewers will use in pairs and independently  
46  
47 an extraction form to record the year of publication, number of patients included, duration  
48  
49 of follow-up, information regarding the inclusion and exclusion criteria, type of  
50  
51 intervention (frequency, descriptions, durations), baseline data (average age, gender,  
52  
53 weight, BMI and WC, glycemic control prior to the study, duration of T2DM, medications  
54  
55 in use), and all reported outcome measures (in all time points). To ensure consistency  
56  
57 between the reviewers, we will perform a calibration exercise before beginning the  
58  
59  
60

1  
2  
3 review. In the case of duplicate publications or more reports from the primary trial, data  
4  
5 extraction will be optimized using the best information available for all the items in the  
6  
7 same trial.  
8  
9

### 10 **Assessment of bias risk in the included studies**

11  
12  
13  
14 For each selected trial, the risk of bias will be assessed according to the criteria  
15  
16 described in the revised Cochrane risk-of-bias tool for randomized trials (RoB 2 tool),<sup>31</sup>  
17  
18 which considers the following five domains for each outcome evaluated: (1) bias arising  
19  
20 from the randomization process, (2) bias due to deviations from intended interventions,  
21  
22 (3) bias due to missing outcome data, (4) bias in the measurement of the outcome, and  
23  
24 (5) bias in the selection of the reported result. Each of the items will be evaluated by two  
25  
26 reviewers as having low risk of bias, some concerns, and high risk of bias. In case of  
27  
28 disagreement, a discussion between the reviewers before the final classification will be  
29  
30 held.  
31  
32  
33  
34

### 35 **Data synthesis**

### 36 **Dealing with missing data**

37  
38  
39  
40  
41 The authors of the original studies will be contacted, if necessary, to provide  
42  
43 missing information for each study included. We will use the data available in published  
44  
45 articles provided by their authors or registration platforms. If available, we will  
46  
47 preferentially use the data from intention-to-treat analysis. If numerical outcome data are  
48  
49 missing and they cannot be obtained from the authors, we will calculate them, when  
50  
51 possible, from other available statistics, such as p values.<sup>32</sup> If an outcome value is reported  
52  
53 without a measure of variance, standard deviations (SDs) will be imputed according to  
54  
55 the method suggested by Furukawa et al.<sup>33</sup>  
56  
57  
58  
59  
60

## Assessment of transitivity across treatment comparisons

The transitivity across treatment comparisons will be assessed using boxplots, and we are proposing the following seven a priori hypotheses to explain the variability between studies as possible effect modifiers: (1) patient characteristics (average patient age, gender distribution, disease severity, time of diabetes diagnosis, presence of diabetes chronic complications), (2) type of pharmacological treatment of T2DM, (3) study methodology quality (low risk of bias compared with high risk of bias), sample size (large versus small studies), (4) duration of follow-up (6–12 months, greater than 12 months), (5) frequency of sessions/visits with participants, and (6) adherence to a healthier lifestyle. Usual care of T2DM will be assessed for their similarity across treatment comparisons.<sup>34</sup>

## Network meta-analysis

We will perform an NMA for each outcome to simultaneously compare multiple interventions in a single model using the Stata Statistical Software 16 (StataCorp. 2019. *Stata Statistical Software: Release 16*. College Station, TX: StataCorp LLC).

We will preferentially pool the direct evidence; however, in the absence of direct comparisons, the effect estimate will be provided by indirect comparisons.

Considering the expected between-study heterogeneity, we will use a random effects (RE) model for each intervention comparison.

We will pool the data of each outcome using a Bayesian RE model separately. For dichotomous data, effect estimates will be calculated using odds ratio with a 95% credible interval (CrI). The continuous data will be expressed as means and SDs for each study, and the mean difference or standardized mean difference (if different metrics are used



1  
2  
3 across studies) will be calculated with their respective 95% CrIs. For count outcomes, we  
4  
5 will calculate the rate ratio with a 95% CrI. For multi-arm studies, we plan to use data  
6  
7 from all reported comparisons using the approach suggested by Rucker et al. by reducing  
8  
9 the relevant weighting scheme.<sup>35</sup>  
10  
11

12  
13 The intervention effect estimates will be presented along with their corresponding  
14  
15 95% CrIs, and we will obtain the treatment hierarchy using the surface under the  
16  
17 cumulative ranking (SUCRA) curve, with its 95% CrI, and the rank-heat plot.<sup>36 37</sup> It is  
18  
19 expected that the best treatment will have high SUCRA values while the worst will have  
20  
21 low values. For each comparison, we will present the direct, indirect, and network  
22  
23 estimates.  
24  
25

### 26 27 **Assessment of statistical heterogeneity**

28  
29  
30 For direct evidence, we will assess heterogeneity by estimating the magnitude of  
31  
32 the between-study variance using the empirical distribution as estimated by Turner et al.<sup>38</sup>  
33  
34 and Rhodes et al.<sup>39</sup> and by using the  $I^2$  statistic to quantify the percentage of variability  
35  
36 due to true differences between studies rather than sampling error.<sup>40 41</sup> We will interpret  
37  
38 the  $I^2$  according to thresholds set forth by the Cochrane Collaboration<sup>32</sup>, and it will be  
39  
40 used as a criterion for pooling or not the results and for performing additional subgroup  
41  
42 analyses. For count outcomes, we will use a minimally informative prior distribution ( $\sim$   
43  
44 Uniform[0,2]).<sup>42</sup>  
45  
46  
47  
48  
49

50 If enough studies are available, we will perform subgroup analysis using the same  
51  
52 potential treatment effect modifiers described above. Our a priori hypothesis is as follows:  
53  
54 individuals with greater than 10 years of T2DM, taking insulin, with a poorly controlled  
55  
56 diabetes at baseline (an uninterrupted HbA1c >8.0% for  $\geq 1$  year despite standard care),  
57  
58 and with more than one of the macro or micro chronic diabetes complications, the  
59  
60

1  
2  
3 subgroups analysis may show less improvement in the primary and secondary outcomes.  
4  
5 We will also perform a network meta-regression whenever possible (i.e., when at least 10  
6  
7 studies are available) using the RE model to evaluate the impact of these potential effect  
8  
9 modifiers (patient characteristic, study quality, intervention type, follow-up time,  
10  
11 adherence).

12  
13  
14  
15 With the combination of direct and indirect estimates, violation of the transitivity  
16  
17 assumption (described above) will also lead to inconsistency. We will assess loop  
18  
19 inconsistency (disagreement between direct and indirect estimates) using the loop-  
20  
21 specific method and design inconsistency (disagreement between studies that inform the  
22  
23 same treatment comparison but include a different number of treatment arms) using the  
24  
25 design-by-treatment model based on a chi-squared test.<sup>43-46</sup>

### 26 27 28 29 **Sensitivity analysis**

30  
31  
32 If sufficient studies are available, we will conduct a sensitivity analysis to assess  
33  
34 the robustness of results.<sup>38 39</sup> This analysis will be performed by comparison of studies  
35  
36 with high risk of selection and attrition bias versus studies with low risk of bias in these  
37  
38 domains and studies with data published versus studies with imputed data.

### 39 40 41 42 **Assessment of publication biases**

43  
44  
45 For each treatment comparison, if more than 10 studies are included in the meta-  
46  
47 analysis, we will use the funnel plot to investigate the presence of publication bias.<sup>32</sup> In  
48  
49 such cases, we will also perform the Begg's rank correlation<sup>47</sup> and Egger's regression  
50  
51 tests.<sup>48</sup>

### 52 53 54 55 **Quality of evidence**

1  
2  
3 To determine our confidence in an overall treatment ranking from the NMA, we  
4 will follow the Grading of Recommendations Assessment, Development and Evaluation  
5 (GRADE) approach, with some modifications as described below to reflect specific issues  
6 from NMA.<sup>49</sup> This process will be performed in pairs and independently (RGOFL, LRB,  
7 JSCG, VSNN).

8  
9  
10  
11  
12  
13  
14  
15 Based on the five categories (risk of bias, imprecision, inconsistency, and  
16 publication bias) the certainty of evidence of effect estimates obtained by direct  
17 comparisons will be rated as high, moderate, low, or very low.

18  
19  
20  
21 For indirect comparisons, the quality of evidence in estimates will be rated  
22 following the GRADE categories used for assessing the direct comparisons in addition to  
23 the transitivity assessment. We will focus our assessments on the quality of indirect  
24 evidence on the dominant first-order loop (loops with a single common comparator  
25 connecting the two interventions of the comparison of interest). The quality of evidence  
26 rating for indirect comparisons will be the lower ratings of quality for the two direct  
27 estimates that contribute to the first-order loop of the indirect comparison. For instance,  
28 if one of the direct comparisons is rated as low and the other is rated as moderate evidence,  
29 we will rate the quality of indirect evidence as low.<sup>45</sup> We will rate down the quality of the  
30 indirect comparison one further level for violation of the transitivity assumption  
31 (similarity of trials in terms of population, intervention [type and dosing frequency],  
32 settings, and trial methodology).<sup>45</sup>

33  
34  
35  
36  
37  
38  
39  
40  
41  
42  
43  
44  
45  
46  
47  
48  
49 We will rate the confidence in each NMA effect estimate using the higher rating  
50 when both direct and indirect evidences are present. However, we may rate down  
51 confidence in the network estimate if we find that the direct and indirect estimates have  
52 inconsistency (measured by the difference of point estimates and the extent of overlap of  
53 CrIs and of direct and indirect effect estimates).

## DISCUSSION

With the consistent increase in the prevalence of T2DM together with the unsatisfactory glycaemic control by some individuals, the search for new and effective strategies for the prevention and control of this metabolic disease is underway.

Since inadequate glycaemic control in DM is most often related to poor adherence to lifestyle changes and to the proposed treatment, initiatives have emerged to promote a better acceptance/understanding of the disease and its treatment by the patients. With this, it is expected that individuals have a more active participation in the control of his, disease, thus achieving higher rates of glycaemic control and fewer complications associated with this dysglycemia.

Although several systematic reviews have evaluated the effectiveness of these strategies in the management of T2DM,<sup>8 50</sup> to the best of our knowledge to date, there are no systematic reviews and NMA considering the direct and indirect effects of non-pharmacological interventions targeting a greater control of T2DM.

## ETHICS AND DISSEMINATION

Since primary data collection will be undertaken, no formal ethical assessment is required by our institution. We plan to present the findings of this systematic review in a peer-reviewed scientific journal. We also intend to present it, including preliminary findings, at the appropriate conferences.

### **Authors' contributions:**

1  
2  
3 VSNN, LT, and AAV conceptualized and design the study. LT, RGOFL, AAV,  
4 and VSNN drafted the manuscript protocol. VSNN, RGOFL, LRB, ALM, JSCG, FB,  
5  
6  
7 AAV, and LT critically revised the protocol and manuscript submitted. All authors read  
8  
9  
10 and approved the final manuscript.  
11  
12

### 13 **Funding statement:**

14  
15  
16 This research has been partially supported by the São Paulo Research Foundation  
17  
18 (Grant number: 2018/25035-5), and AAV is funded by the European Union's Horizon  
19  
20  
21 2020 (No. 754936).  
22  
23

### 24 **Competing interests' statement:**

25  
26  
27 There are no competing interests.  
28  
29

### 30 **REFERENCES**

- 31  
32  
33 1. Lopez Stewart G, Tambascia M, Rosas Guzman J, et al. Control of type 2 diabetes mellitus  
34 among general practitioners in private practice in nine countries of Latin America. *Rev*  
35 *Panam Salud Publica* 2007;22(1):12-20. doi: 10.1590/s1020-49892007000600002  
36 [published Online First: 2007/10/13]  
37  
38 2. Saaddine JB, Cadwell B, Gregg EW, et al. Improvements in diabetes processes of care and  
39 intermediate outcomes: United States, 1988-2002. *Ann Intern Med* 2006;144(7):465-  
40 74. [published Online First: 2006/04/06]  
41  
42 3. Franz MJ, MacLeod J. Success of nutrition-therapy interventions in persons with type 2  
43 diabetes: challenges and future directions. *Diabetes Metab Syndr Obes* 2018;11:265-  
44 70. doi: 10.2147/DMSO.S141952 [published Online First: 2018/06/22]  
45  
46 4. Gregg EW, Chen H, Wagenknecht LE, et al. Association of an intensive lifestyle intervention  
47 with remission of type 2 diabetes. *JAMA* 2012;308(23):2489-96. doi:  
48 10.1001/jama.2012.67929 [published Online First: 2013/01/05]  
49  
50 5. Franz MJ, Boucher JL, Rutten-Ramos S, et al. Lifestyle weight-loss intervention outcomes in  
51 overweight and obese adults with type 2 diabetes: a systematic review and meta-  
52 analysis of randomized clinical trials. *J Acad Nutr Diet* 2015;115(9):1447-63. doi:  
53 10.1016/j.jand.2015.02.031 [published Online First: 2015/05/04]  
54  
55 6. American Diabetes A. Standards of Medical Care in Diabetes-2017 Abridged for Primary Care  
56 Providers. *Clin Diabetes* 2017;35(1):5-26. doi: 10.2337/cd16-0067 [published Online  
57 First: 2017/02/02]  
58  
59 7. Jacob S, Serrano-Gil M. Engaging and empowering patients to manage their type 2 diabetes,  
60 Part II: Initiatives for success. *Advances in therapy* 2010;27(10):665-80. doi:  
10.1007/s12325-010-0071-0 [published Online First: 2010/09/17]

- 1
  - 2
  - 3
  - 4
  - 5
  - 6
  - 7
  - 8
  - 9
  - 10
  - 11
  - 12
  - 13
  - 14
  - 15
  - 16
  - 17
  - 18
  - 19
  - 20
  - 21
  - 22
  - 23
  - 24
  - 25
  - 26
  - 27
  - 28
  - 29
  - 30
  - 31
  - 32
  - 33
  - 34
  - 35
  - 36
  - 37
  - 38
  - 39
  - 40
  - 41
  - 42
  - 43
  - 44
  - 45
  - 46
  - 47
  - 48
  - 49
  - 50
  - 51
  - 52
  - 53
  - 54
  - 55
  - 56
  - 57
  - 58
  - 59
  - 60
8. Serrano-Gil M, Jacob S. Engaging and empowering patients to manage their type 2 diabetes, Part I: a knowledge, attitude, and practice gap? *Advances in therapy* 2010;27(6):321-33. doi: 10.1007/s12325-010-0034-5 [published Online First: 2010/06/17]
9. Chapman A, Liu S, Merkouris S, et al. Psychological Interventions for the Management of Glycemic and Psychological Outcomes of Type 2 Diabetes Mellitus in China: A Systematic Review and Meta-Analyses of Randomized Controlled Trials. *Frontiers in public health* 2015;3:252. doi: 10.3389/fpubh.2015.00252 [published Online First: 2015/12/05]
10. Odgers-Jewell K, Ball LE, Kelly JT, et al. Effectiveness of group-based self-management education for individuals with Type 2 diabetes: a systematic review with meta-analyses and meta-regression. *Diabetic medicine : a journal of the British Diabetic Association* 2017;34(8):1027-39. doi: 10.1111/dme.13340 [published Online First: 2017/02/23]
11. Chew BH, Vos RC, Metzendorf MI, et al. Psychological interventions for diabetes-related distress in adults with type 2 diabetes mellitus. *The Cochrane database of systematic reviews* 2017;9:CD011469. doi: 10.1002/14651858.CD011469.pub2 [published Online First: 2017/09/28]
12. Spencer-Bonilla G, Ponce OJ, Rodriguez-Gutierrez R, et al. A systematic review and meta-analysis of trials of social network interventions in type 2 diabetes. *BMJ Open* 2017;7(8):e016506. doi: 10.1136/bmjopen-2017-016506 [published Online First: 2017/08/23]
13. Browning C, Chapman A, Yang H, et al. Management of type 2 diabetes in China: the Happy Life Club, a pragmatic cluster randomised controlled trial using health coaches. *BMJ open* 2016;6(3):e009319. doi: 10.1136/bmjopen-2015-009319
14. Liss DT, Finch EA, Cooper A, et al. One-year effects of a group-based lifestyle intervention in adults with type 2 diabetes: a randomized encouragement trial. *Diabetes research and clinical practice* 2018;140:36-44. doi: 10.1016/j.diabres.2018.03.030
15. Edelman D, Dolor RJ, Coffman CJ, et al. Nurse-led behavioral management of diabetes and hypertension in community practices: a randomized trial. *Journal of general internal medicine* 2015;30(5):626-33. doi: 10.1007/s11606-014-3154-9
16. Mash RJ, Rhode H, Zwarenstein M, et al. Effectiveness of a group diabetes education programme in under-served communities in South Africa: a pragmatic cluster randomized controlled trial. *Diabetic medicine* 2014;31(8):987-93. doi: 10.1111/dme.12475
17. Cipriani A, Higgins JP, Geddes JR, et al. Conceptual and technical challenges in network meta-analysis. *Ann Intern Med* 2013;159(2):130-7. doi: 10.7326/0003-4819-159-2-201307160-00008 [published Online First: 2013/07/17]
18. Shamseer L, Moher D, Clarke M, et al. Preferred reporting items for systematic review and meta-analysis protocols (PRISMA-P) 2015: elaboration and explanation. *BMJ (Clinical research ed)* 2015;350:g7647. doi: 10.1136/bmj.g7647 [published Online First: 2015/01/04]
19. Effective Practice and Organisation of Care (EPOC). EPOC Taxonomy 2015 [Available from: <https://epoc.cochrane.org/epoc-taxonomy> accessed 04 July 2019.
20. Davies MJ, D'Alessio DA, Fradkin J, et al. Management of Hyperglycemia in Type 2 Diabetes, 2018. A Consensus Report by the American Diabetes Association (ADA) and the European Association for the Study of Diabetes (EASD). *Diabetes care* 2018;41(12):2669-701. doi: 10.2337/dci18-0033 [published Online First: 2018/10/07]
21. Johansen MY, MacDonald CS, Hansen KB, et al. Effect of an Intensive Lifestyle Intervention on Glycemic Control in Patients With Type 2 Diabetes: A Randomized Clinical Trial. *JAMA* 2017;318(7):637-46. doi: 10.1001/jama.2017.10169 [published Online First: 2017/08/16]
22. Chatterjee S, Davies MJ, Heller S, et al. Diabetes structured self-management education programmes: a narrative review and current innovations. *Lancet Diabetes Endocrinol*

- 2018;6(2):130-42. doi: 10.1016/S2213-8587(17)30239-5 [published Online First: 2017/10/04]
23. Greenwood DA, Gee PM, Fatkin KJ, et al. A Systematic Review of Reviews Evaluating Technology-Enabled Diabetes Self-Management Education and Support. *J Diabetes Sci Technol* 2017;11(5):1015-27. doi: 10.1177/1932296817713506 [published Online First: 2017/06/01]
24. Aubert RE, Herman WH, Waters J, et al. Nurse case management to improve glycemic control in diabetic patients in a health maintenance organization. A randomized, controlled trial. *Ann Intern Med* 1998;129(8):605-12. doi: 10.7326/0003-4819-129-8-199810150-00004 [published Online First: 1998/10/24]
25. Azami G, Soh KL, Sazlina SG, et al. Effect of a Nurse-Led Diabetes Self-Management Education Program on Glycosylated Hemoglobin among Adults with Type 2 Diabetes. *J Diabetes Res* 2018;2018:4930157. doi: 10.1155/2018/4930157 [published Online First: 2018/09/19]
26. Zhu H, Zhu Y, Leung SW. Is self-monitoring of blood glucose effective in improving glycaemic control in type 2 diabetes without insulin treatment: a meta-analysis of randomised controlled trials. *BMJ Open* 2016;6(9):e010524. doi: 10.1136/bmjopen-2015-010524 [published Online First: 2016/09/04]
27. Willard-Grace R, Chen EH, Hessler D, et al. Health coaching by medical assistants to improve control of diabetes, hypertension, and hyperlipidemia in low-income patients: a randomized controlled trial. *Ann Fam Med* 2015;13(2):130-8. doi: 10.1370/afm.1768 [published Online First: 2015/03/11]
28. Hermans MP, Elisaf M, Michel G, et al. Benchmarking is associated with improved quality of care in type 2 diabetes: the OPTIMISE randomized, controlled trial. *Diabetes care* 2013;36(11):3388-95. doi: 10.2337/dc12-1853 [published Online First: 2013/07/13]
29. Simoes Correa Galendi J, Leite R, Mendes AL, et al. Effectiveness of strategies for nutritional therapy for patients with type 2 diabetes and/or hypertension in primary care: protocol of a systematic review of randomised controlled trials. *BMJ Open* 2019;9(9):e030450. doi: 10.1136/bmjopen-2019-030450 [published Online First: 2019/09/07]
30. Ouzzani M, Hammady H, Fedorowicz Z, et al. Rayyan-a web and mobile app for systematic reviews. *Syst Rev* 2016;5(1):210. doi: 10.1186/s13643-016-0384-4 [published Online First: 2016/12/07]
31. Higgins JPT SJ, Savović J, Page MJ, Hróbjartsson A, Boutron I, Reeves B, Eldridge S., editor. A revised tool for assessing risk of bias in randomized trials In: Chandler J, McKenzie J, Boutron I, Welch V (editors). *Cochrane Methods. Cochrane Database of Systematic Reviews* 2016.
32. Collaboration TC. *Cochrane Handbook for Systematic Reviews of Interventions* Version 5.1.0 [updated March 2011], 2011.
33. Furukawa TA, Barbui C, Cipriani A, et al. Imputing missing standard deviations in meta-analyses can provide accurate results. *J Clin Epidemiol* 2006;59(1):7-10. doi: 10.1016/j.jclinepi.2005.06.006 [published Online First: 2005/12/20]
34. Salanti G, Marinho V, Higgins JP. A case study of multiple-treatments meta-analysis demonstrates that covariates should be considered. *J Clin Epidemiol* 2009;62(8):857-64. doi: 10.1016/j.jclinepi.2008.10.001 [published Online First: 2009/01/23]
35. Rucker G, Schwarzer G. Reduce dimension or reduce weights? Comparing two approaches to multi-arm studies in network meta-analysis. *Stat Med* 2014;33(25):4353-69. doi: 10.1002/sim.6236 [published Online First: 2014/06/20]
36. Salanti G, Ades AE, Ioannidis JP. Graphical methods and numerical summaries for presenting results from multiple-treatment meta-analysis: an overview and tutorial. *J Clin Epidemiol* 2011;64(2):163-71. doi: 10.1016/j.jclinepi.2010.03.016 [published Online First: 2010/08/07]

- 1
  - 2
  - 3
  - 4
  - 5
  - 6
  - 7
  - 8
  - 9
  - 10
  - 11
  - 12
  - 13
  - 14
  - 15
  - 16
  - 17
  - 18
  - 19
  - 20
  - 21
  - 22
  - 23
  - 24
  - 25
  - 26
  - 27
  - 28
  - 29
  - 30
  - 31
  - 32
  - 33
  - 34
  - 35
  - 36
  - 37
  - 38
  - 39
  - 40
  - 41
  - 42
  - 43
  - 44
  - 45
  - 46
  - 47
  - 48
  - 49
  - 50
  - 51
  - 52
  - 53
  - 54
  - 55
  - 56
  - 57
  - 58
  - 59
  - 60
37. Veroniki AA, Straus SE, Fyraridis A, et al. The rank-heat plot is a novel way to present the results from a network meta-analysis including multiple outcomes. *J Clin Epidemiol* 2016;76:193-9. doi: 10.1016/j.jclinepi.2016.02.016 [published Online First: 2016/03/05]
38. Turner RM, Davey J, Clarke MJ, et al. Predicting the extent of heterogeneity in meta-analysis, using empirical data from the Cochrane Database of Systematic Reviews. *Int J Epidemiol* 2012;41(3):818-27. doi: 10.1093/ije/dys041 [published Online First: 2012/03/31]
39. Rhodes KM, Turner RM, Higgins JP. Predictive distributions were developed for the extent of heterogeneity in meta-analyses of continuous outcome data. *J Clin Epidemiol* 2015;68(1):52-60. doi: 10.1016/j.jclinepi.2014.08.012 [published Online First: 2014/10/12]
40. Higgins JP, Thompson SG. Quantifying heterogeneity in a meta-analysis. *Stat Med* 2002;21(11):1539-58. doi: 10.1002/sim.1186 [published Online First: 2002/07/12]
41. Higgins JP, Thompson SG, Deeks JJ, et al. Measuring inconsistency in meta-analyses. *BMJ (Clinical research ed)* 2003;327(7414):557-60. doi: 10.1136/bmj.327.7414.557 [published Online First: 2003/09/06]
42. Lambert PC, Sutton AJ, Burton PR, et al. How vague is vague? A simulation study of the impact of the use of vague prior distributions in MCMC using WinBUGS. *Stat Med* 2005;24(15):2401-28. doi: 10.1002/sim.2112 [published Online First: 2005/07/15]
43. White IR, Barrett JK, Jackson D, et al. Consistency and inconsistency in network meta-analysis: model estimation using multivariate meta-regression. *Res Synth Methods* 2012;3(2):111-25. doi: 10.1002/jrsm.1045 [published Online First: 2012/06/01]
44. Higgins JP, Jackson D, Barrett JK, et al. Consistency and inconsistency in network meta-analysis: concepts and models for multi-arm studies. *Res Synth Methods* 2012;3(2):98-110. doi: 10.1002/jrsm.1044 [published Online First: 2012/06/01]
45. Veroniki AA, Mavridis D, Higgins JP, et al. Characteristics of a loop of evidence that affect detection and estimation of inconsistency: a simulation study. *BMC Med Res Methodol* 2014;14:106. doi: 10.1186/1471-2288-14-106 [published Online First: 2014/09/23]
46. Veroniki AA, Vasiliadis HS, Higgins JP, et al. Evaluation of inconsistency in networks of interventions. *Int J Epidemiol* 2013;42(1):332-45. doi: 10.1093/ije/dys222 [published Online First: 2013/03/20]
47. Begg CB, Mazumdar M. Operating characteristics of a rank correlation test for publication bias. *Biometrics* 1994;50(4):1088-101. [published Online First: 1994/12/01]
48. Egger M, Davey Smith G, Schneider M, et al. Bias in meta-analysis detected by a simple, graphical test. *BMJ (Clinical research ed)* 1997;315(7109):629-34. doi: 10.1136/bmj.315.7109.629 [published Online First: 1997/10/06]
49. Salanti G, Del Giovane C, Chaimani A, et al. Evaluating the quality of evidence from a network meta-analysis. *PLoS One* 2014;9(7):e99682. doi: 10.1371/journal.pone.0099682 [published Online First: 2014/07/06]
50. Loveman E, Frampton GK, Clegg AJ. The clinical effectiveness of diabetes education models for Type 2 diabetes: a systematic review. *Health technology assessment (Winchester, England)* 2008;12(9):1-116, iii. [published Online First: 2008/04/15]



1  
2  
3  
4  
5  
6  
7  
8  
9

## SUPPLEMENTARY DATA APPENDIX 1

### Search Strategy – PubMed (November 25, 2019)

10 #1 "Diabetes Mellitus, Type 2"[Mesh] OR (Diabetes Mellitus, Noninsulin-Dependent) OR  
11 (Diabetes Mellitus, Ketosis Resistant) OR (Ketosis-Resistant Diabetes Mellitus) OR (Diabetes  
12 Mellitus, Non Insulin Dependent) OR (Diabetes Mellitus, Non-Insulin-Dependent) OR (Non-  
13 Insulin-Dependent Diabetes Mellitus) OR (Diabetes Mellitus, Stable) OR (Stable Diabetes  
14 Mellitus) OR (Diabetes Mellitus, Type II) OR(NIDDM) OR (Diabetes Mellitus, Noninsulin  
15 Dependent) OR (Diabetes Mellitus, Maturity-Onset) OR (Diabetes Mellitus, Maturity Onset)  
16 OR (Maturity-Onset Diabetes Mellitus) OR (Maturity Onset Diabetes Mellitus) OR (MODY)  
17 OR (Diabetes Mellitus, Slow-Onset) OR (Diabetes Mellitus, Slow Onset) OR (Slow-Onset  
18 Diabetes Mellitus) OR (Type 2 Diabetes Mellitus) OR (Noninsulin-Dependent Diabetes  
19 Mellitus) OR (Noninsulin Dependent Diabetes Mellitus) OR (Maturity-Onset Diabetes) OR  
20 (Diabetes, Maturity-Onset) OR (Maturity Onset Diabetes) OR (Type 2 Diabetes) OR  
21 (Diabetes, Type 2) OR (Diabetes Mellitus, Adult-Onset) OR (Adult-Onset Diabetes Mellitus)  
22 OR (Diabetes Mellitus, Adult Onset)

23  
24  
25 #2 "Primary Health Care"[Mesh] OR (Care, Primary Health) OR (Health Care, Primary) OR  
26 (Primary Healthcare) OR (Healthcare, Primary) OR (Primary Care) OR (Care, Primary) or  
27 "Physicians, Primary Care"[Mesh] OR (Physician, Primary Care) OR (Primary Care Physician)  
28 OR (Primary Care Physicians) OR (Healthy Primary Care) OR "Primary Care Nursing"[Mesh]  
29 OR (Care Nursing, Primary) OR (Nursing, Primary Care)

30  
31  
32 #3 "Community Health Planning"[Mesh] OR (Community Health Plannings) OR (Health  
33 Planning, Community) OR (Health Plannings, Community) OR (Planning, Community Health)  
34 OR (Plannings, Community Health) OR (Population-Based Planning) OR (Planning,  
35 Population-Based) OR (Plannings, Population-Based) OR (Population Based Planning) OR  
36 (Population-Based Plannings) OR (Community Health Systems) OR (Community Health  
37 System) OR (Health System, Community) OR (Health Systems, Community) OR (System,  
38 Community Health) OR (Systems, Community Health)

39  
40  
41  
42 #4\* randomized controlled trial[pt] OR controlled clinical trial[pt] OR randomized[tiab] OR  
43 placebo[tiab] OR clinical trials as topic[mesh:noexp] OR randomly[tiab] OR trial[ti] NOT  
44 (animals[mh] NOT humans [mh])

45  
46 #1 AND #2 AND #3 AND #4

47  
48  
49 \* Direct link to PubMed with **sensitivity- and precision-maximizing version**(2008  
50 revision).<sup>1</sup> Lefebvre C, Manheimer E, Glanville J. Chapter 6: Searching for studies.  
51 In: Higgins J, Green S (editors). Cochrane Handbook for Systematic Reviews of  
52 Interventions. Version 5.1.0 (updated March 2011). The Cochrane Collaboration,  
53 2011. Available from **www.cochrane-handbook.org**

# Reporting checklist for protocol of a systematic review.

Based on the PRISMA-P guidelines.

## Instructions to authors

Complete this checklist by entering the page numbers from your manuscript where readers will find each of the items listed below.

Your article may not currently address all the items on the checklist. Please modify your text to include the missing information. If you are certain that an item does not apply, please write "n/a" and provide a short explanation.

Upload your completed checklist as an extra file when you submit to a journal.

In your methods section, say that you used the PRISMA-P reporting guidelines, and cite them as:

Moher D, Shamseer L, Clarke M, Ghersi D, Liberati A, Petticrew M, Shekelle P, Stewart LA. Preferred Reporting Items for Systematic Review and Meta-Analysis Protocols (PRISMA-P) 2015 statement. *Syst Rev.* 2015;4(1):1.

|                |                     | Reporting Item                                                                                                                            | Page Number |
|----------------|---------------------|-------------------------------------------------------------------------------------------------------------------------------------------|-------------|
| Identification | <a href="#">#1a</a> | Identify the report as a protocol of a systematic review                                                                                  | 1           |
| Update         | <a href="#">#1b</a> | If the protocol is for an update of a previous systematic review, identify as such                                                        | n/a         |
|                | <a href="#">#2</a>  | If registered, provide the name of the registry (such as PROSPERO) and registration number                                                | 3           |
| Contact        | <a href="#">#3a</a> | Provide name, institutional affiliation, e-mail address of all protocol authors; provide physical mailing address of corresponding author | 1           |
| Contribution   | <a href="#">#3b</a> | Describe contributions of protocol authors and identify the guarantor of the review                                                       | 16          |
|                | <a href="#">#4</a>  | If the protocol represents an amendment of a previously completed or published protocol, identify as such and list                        | n/a         |

|    |                      |                      |                                                                 |       |
|----|----------------------|----------------------|-----------------------------------------------------------------|-------|
| 1  |                      |                      | changes; otherwise, state plan for documenting important        |       |
| 2  |                      |                      | protocol amendments                                             |       |
| 3  |                      |                      |                                                                 |       |
| 4  | Sources              | <a href="#">#5a</a>  | Indicate sources of financial or other support for the review   | 17    |
| 5  |                      |                      |                                                                 |       |
| 6  | Sponsor              | <a href="#">#5b</a>  | Provide name for the review funder and / or sponsor             | 17    |
| 7  |                      |                      |                                                                 |       |
| 8  | Role of sponsor or   | <a href="#">#5c</a>  | Describe roles of funder(s), sponsor(s), and / or               | n/a   |
| 9  | funder               |                      | institution(s), if any, in developing the protocol              |       |
| 10 |                      |                      |                                                                 |       |
| 11 |                      |                      |                                                                 |       |
| 12 | Rationale            | <a href="#">#6</a>   | Describe the rationale for the review in the context of what is | 4     |
| 13 |                      |                      | already known                                                   |       |
| 14 |                      |                      |                                                                 |       |
| 15 |                      |                      |                                                                 |       |
| 16 | Objectives           | <a href="#">#7</a>   | Provide an explicit statement of the question(s) the review     | 7-9   |
| 17 |                      |                      | will address with reference to participants, interventions,     |       |
| 18 |                      |                      | comparators, and outcomes (PICO)                                |       |
| 19 |                      |                      |                                                                 |       |
| 20 |                      |                      |                                                                 |       |
| 21 | Eligibility criteria | <a href="#">#8</a>   | Specify the study characteristics (such as PICO, study          | 7-9   |
| 22 |                      |                      | design, setting, time frame) and report characteristics (such   |       |
| 23 |                      |                      | as years considered, language, publication status) to be        |       |
| 24 |                      |                      | used as criteria for eligibility for the review                 |       |
| 25 |                      |                      |                                                                 |       |
| 26 |                      |                      |                                                                 |       |
| 27 |                      |                      |                                                                 |       |
| 28 | Information          | <a href="#">#9</a>   | Describe all intended information sources (such as              | 9     |
| 29 | sources              |                      | electronic databases, contact with study authors, trial         |       |
| 30 |                      |                      | registers or other grey literature sources) with planned dates  |       |
| 31 |                      |                      | of coverage                                                     |       |
| 32 |                      |                      |                                                                 |       |
| 33 |                      |                      |                                                                 |       |
| 34 |                      |                      |                                                                 |       |
| 35 | Search strategy      | <a href="#">#10</a>  | Present draft of search strategy to be used for at least one    | Supp. |
| 36 |                      |                      | electronic database, including planned limits, such that it     | Data  |
| 37 |                      |                      | could be repeated                                               |       |
| 38 |                      |                      |                                                                 |       |
| 39 |                      |                      |                                                                 |       |
| 40 | Study records -      | <a href="#">#11a</a> | Describe the mechanism(s) that will be used to manage           | 9-10  |
| 41 | data management      |                      | records and data throughout the review                          |       |
| 42 |                      |                      |                                                                 |       |
| 43 |                      |                      |                                                                 |       |
| 44 | Study records -      | <a href="#">#11b</a> | State the process that will be used for selecting studies       | 10    |
| 45 | selection process    |                      | (such as two independent reviewers) through each phase of       |       |
| 46 |                      |                      | the review (that is, screening, eligibility and inclusion in    |       |
| 47 |                      |                      | meta-analysis)                                                  |       |
| 48 |                      |                      |                                                                 |       |
| 49 |                      |                      |                                                                 |       |
| 50 |                      |                      |                                                                 |       |
| 51 | Study records -      | <a href="#">#11c</a> | Describe planned method of extracting data from reports         | 10    |
| 52 | data collection      |                      | (such as piloting forms, done independently, in duplicate),     |       |
| 53 | process              |                      | any processes for obtaining and confirming data from            |       |
| 54 |                      |                      | investigators                                                   |       |
| 55 |                      |                      |                                                                 |       |
| 56 |                      |                      |                                                                 |       |
| 57 |                      |                      |                                                                 |       |
| 58 |                      |                      |                                                                 |       |
| 59 |                      |                      |                                                                 |       |
| 60 |                      |                      |                                                                 |       |

|    |                    |                      |                                                                                                                                                                                                                                                           |       |
|----|--------------------|----------------------|-----------------------------------------------------------------------------------------------------------------------------------------------------------------------------------------------------------------------------------------------------------|-------|
| 1  | Data items         | <a href="#">#12</a>  | List and define all variables for which data will be sought (such as PICO items, funding sources), any pre-planned data assumptions and simplifications                                                                                                   | 10    |
| 2  |                    |                      |                                                                                                                                                                                                                                                           |       |
| 3  |                    |                      |                                                                                                                                                                                                                                                           |       |
| 4  |                    |                      |                                                                                                                                                                                                                                                           |       |
| 5  |                    |                      |                                                                                                                                                                                                                                                           |       |
| 6  | Outcomes and       | <a href="#">#13</a>  | List and define all outcomes for which data will be sought, including prioritization of main and additional outcomes, with rationale                                                                                                                      | 8-9   |
| 7  | prioritization     |                      |                                                                                                                                                                                                                                                           |       |
| 8  |                    |                      |                                                                                                                                                                                                                                                           |       |
| 9  |                    |                      |                                                                                                                                                                                                                                                           |       |
| 10 |                    |                      |                                                                                                                                                                                                                                                           |       |
| 11 | Risk of bias in    | <a href="#">#14</a>  | Describe anticipated methods for assessing risk of bias of individual studies, including whether this will be done at the outcome or study level, or both; state how this information will be used in data synthesis                                      | 11    |
| 12 | individual studies |                      |                                                                                                                                                                                                                                                           |       |
| 13 |                    |                      |                                                                                                                                                                                                                                                           |       |
| 14 |                    |                      |                                                                                                                                                                                                                                                           |       |
| 15 |                    |                      |                                                                                                                                                                                                                                                           |       |
| 16 |                    |                      |                                                                                                                                                                                                                                                           |       |
| 17 |                    |                      |                                                                                                                                                                                                                                                           |       |
| 18 | Data synthesis     | <a href="#">#15a</a> | Describe criteria under which study data will be quantitatively synthesised                                                                                                                                                                               | 11-13 |
| 19 |                    |                      |                                                                                                                                                                                                                                                           |       |
| 20 |                    |                      |                                                                                                                                                                                                                                                           |       |
| 21 |                    |                      |                                                                                                                                                                                                                                                           |       |
| 22 |                    | <a href="#">#15b</a> | If data are appropriate for quantitative synthesis, describe planned summary measures, methods of handling data and methods of combining data from studies, including any planned exploration of consistency (such as I <sup>2</sup> , Kendall's $\tau$ ) | 11-13 |
| 23 |                    |                      |                                                                                                                                                                                                                                                           |       |
| 24 |                    |                      |                                                                                                                                                                                                                                                           |       |
| 25 |                    |                      |                                                                                                                                                                                                                                                           |       |
| 26 |                    |                      |                                                                                                                                                                                                                                                           |       |
| 27 |                    |                      |                                                                                                                                                                                                                                                           |       |
| 28 |                    |                      |                                                                                                                                                                                                                                                           |       |
| 29 |                    | <a href="#">#15c</a> | Describe any proposed additional analyses (such as sensitivity or subgroup analyses, meta-regression)                                                                                                                                                     | 14    |
| 30 |                    |                      |                                                                                                                                                                                                                                                           |       |
| 31 |                    |                      |                                                                                                                                                                                                                                                           |       |
| 32 |                    |                      |                                                                                                                                                                                                                                                           |       |
| 33 |                    | <a href="#">#15d</a> | If quantitative synthesis is not appropriate, describe the type of summary planned                                                                                                                                                                        | N/A   |
| 34 |                    |                      |                                                                                                                                                                                                                                                           |       |
| 35 |                    |                      |                                                                                                                                                                                                                                                           |       |
| 36 | Meta-bias(es)      | <a href="#">#16</a>  | Specify any planned assessment of meta-bias(es) (such as publication bias across studies, selective reporting within studies)                                                                                                                             | 14    |
| 37 |                    |                      |                                                                                                                                                                                                                                                           |       |
| 38 |                    |                      |                                                                                                                                                                                                                                                           |       |
| 39 |                    |                      |                                                                                                                                                                                                                                                           |       |
| 40 |                    |                      |                                                                                                                                                                                                                                                           |       |
| 41 |                    |                      |                                                                                                                                                                                                                                                           |       |
| 42 | Confidence in      | <a href="#">#17</a>  | Describe how the strength of the body of evidence will be assessed (such as GRADE)                                                                                                                                                                        | 14-15 |
| 43 | cumulative         |                      |                                                                                                                                                                                                                                                           |       |
| 44 | evidence           |                      |                                                                                                                                                                                                                                                           |       |
| 45 |                    |                      |                                                                                                                                                                                                                                                           |       |
| 46 |                    |                      |                                                                                                                                                                                                                                                           |       |

The PRISMA-P checklist is distributed under the terms of the Creative Commons Attribution License CC-BY 4.0. This checklist can be completed online using <https://www.goodreports.org/>, a tool made by the [EQUATOR Network](#) in collaboration with [Penelope.ai](#)
